# Supplementary material for: Regionally optimized fire parameterizations using feed-forward neural networks
Source: Copernicus journal article supplement (doi:10.5194/esd-2023-26), 2023-08-30
Supplement: Supplementary file 1 [file esd-2023-26-supplement.pdf]

1 *Supplements of*

2 **Regionally optimized fire parameterizations**  
3 **using feed-forward neural networks**

4

5 Yoo-Geun Ham<sup>1</sup>, Seung-Ho Nam<sup>1</sup>, and Jin-Soo Kim<sup>2</sup>

6

7 <sup>1</sup>Department of Oceanography, Chonnam National University, Gwangju, 61186, South Korea

8 <sup>2</sup>Low-Carbon and Climate Impact Research Centre, School of Energy and Environment, City

9 University of Hong Kong, Tat Chee Ave, Kowloon Tong, Hong Kong, People's Republic of China

10 *Correspondence to:* Prof. Yoo-Geun Ham (ygham@chonnam.ac.kr)

11

12

13

|            | EXP1      | EXP2                         | EXP3                         | EXP4                         | EXP5      |
|------------|-----------|------------------------------|------------------------------|------------------------------|-----------|
| Training   | 2005–2018 | 2009–2020<br>& 2001–<br>2002 | 2013–2020<br>& 2001–<br>2006 | 2017–2020<br>& 2001–<br>2010 | 2001–2014 |
| Validation | 2019–2020 | 2003–2004                    | 2007–2008                    | 2011–2012                    | 2015–2016 |
| Testing    | 2001–2004 | 2005–2008                    | 2009–2012                    | 2013–2016                    | 2017–2020 |

14 Supplementary Table S1. Periods for the training, validation, and testing of the  
15 FFNNs.

16

### Neural Network Configuration

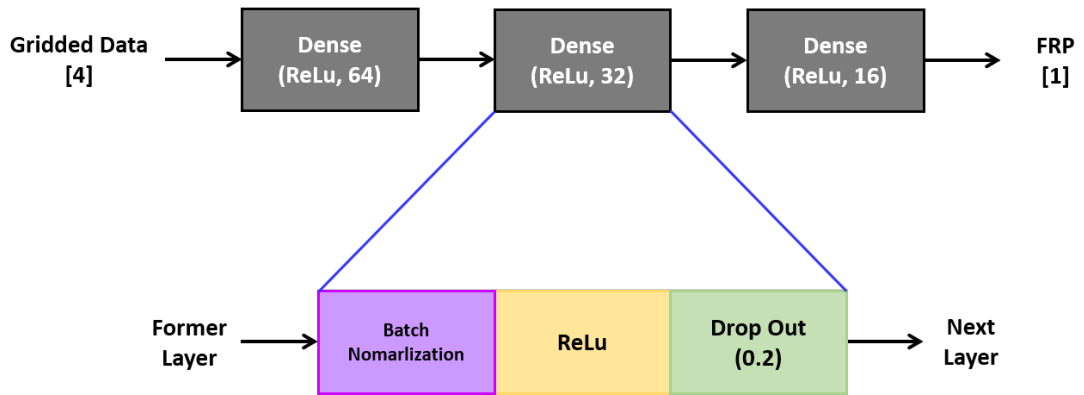

17

18

Supplementary Fig. S1. Configuration of the FFNNs.

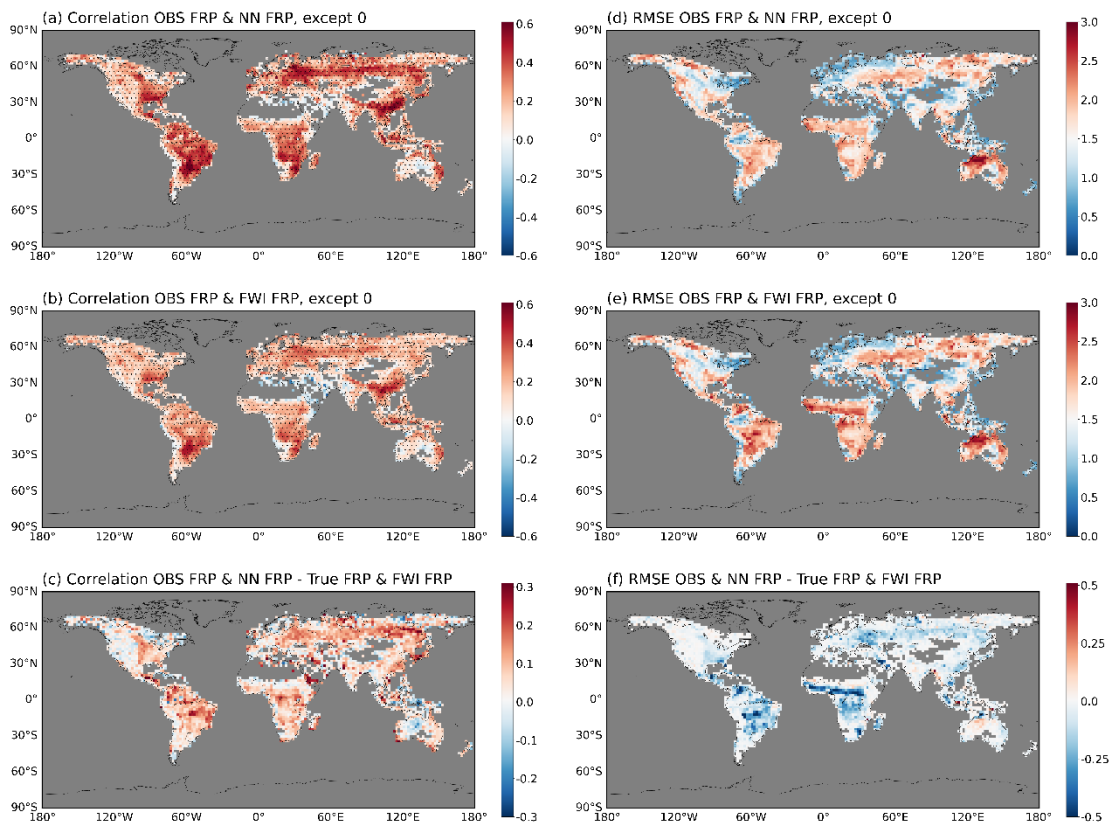

20

21 Supplementary Fig. S2. Same as main Fig. 2, but for cases where the observed FRP &gt;

22 0.

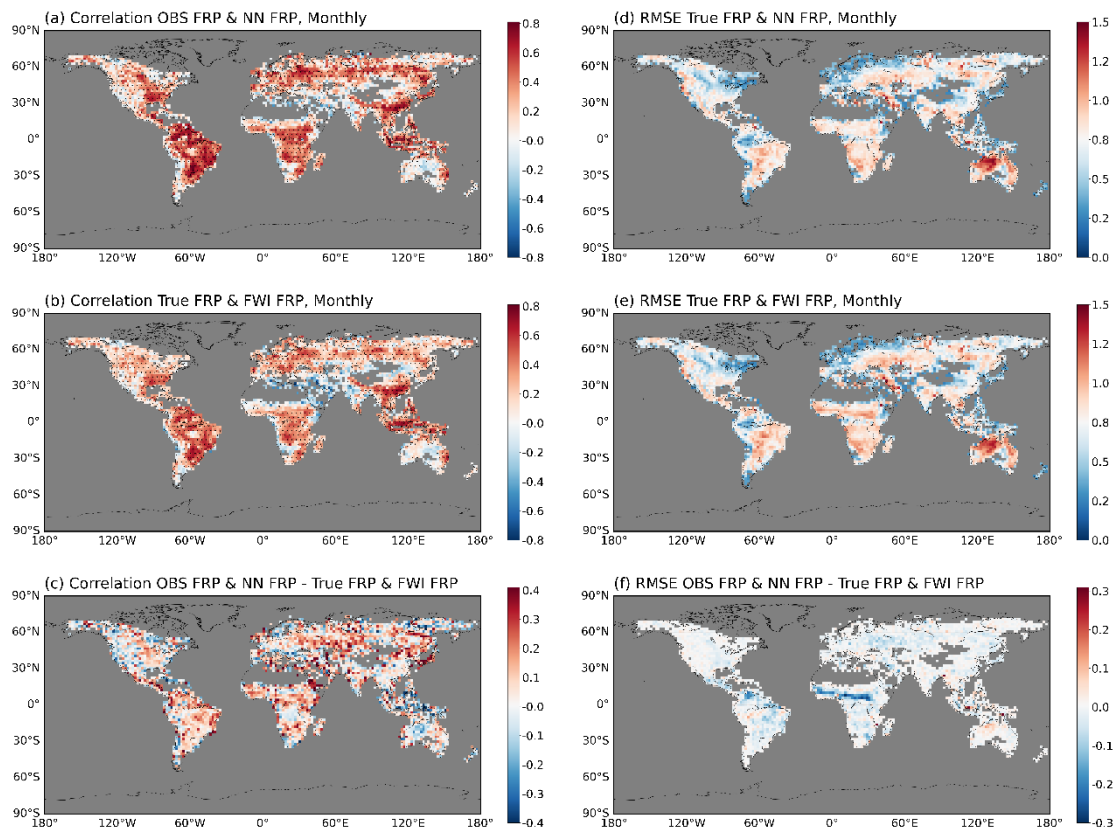

24

25 Supplementary Fig. S3. Same as main Fig. 2, but using monthly-averaged FRP.

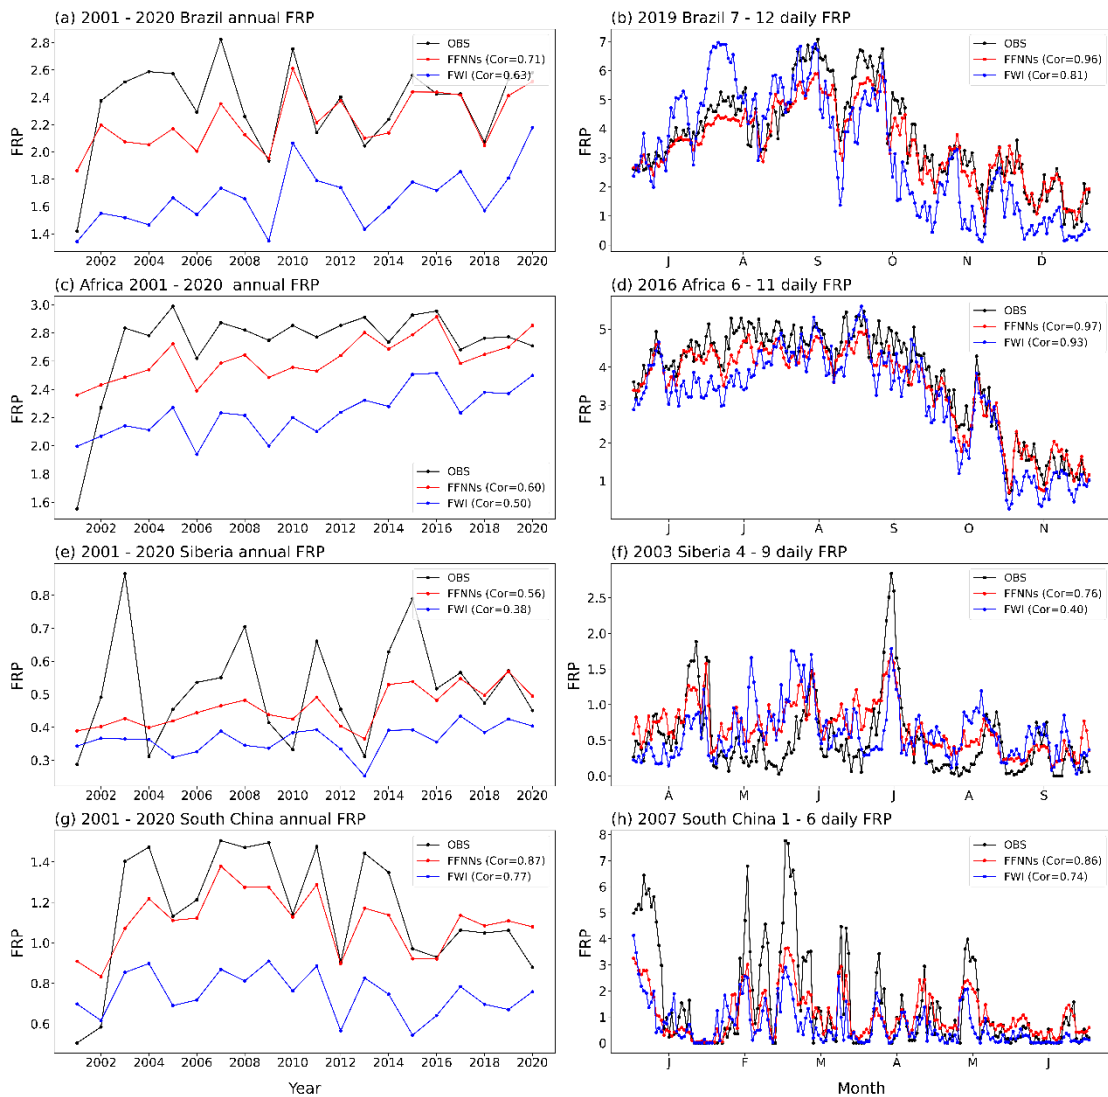

27

28       Supplementary Fig. S4. Time series of the annually-averaged (left) and daily (right)

29 FRP in the observation (black), FFNNs (red), and FWI-based model (blue) over (a), (b)

30 Brazil (64–40°W, 21–1°S), (c), (d) southern Africa (14–36°E, 18°S–6°N), (e), (f)

31 Siberia (104–134°E, 48–60°N), and (g), (h) southern China (108–120°E, 22°N–30°N).

32 Correlation coefficient between the observation and the FFNNs, and FWI-based model

33 is denoted by the red, and blue in each panel, respectively.

34

35

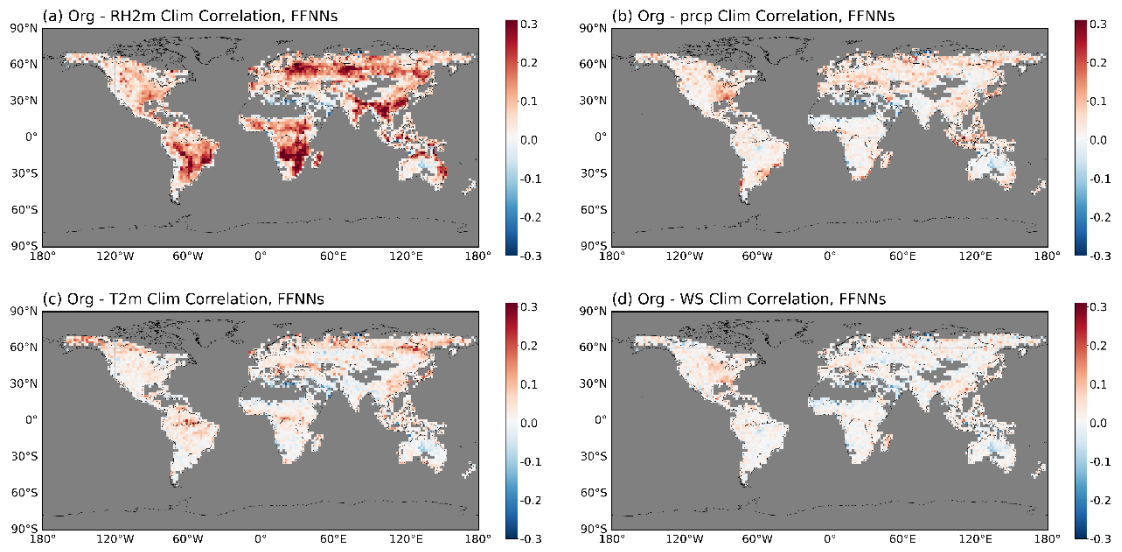

36

37

38

39

40

Supplementary Fig. S5. Difference in the correlation skill of the original FRP estimation in the FFNNs from that by using (a) the RH2m, (b) PRCP, (c) T2m, and (d) WS10m as the daily climatological values.

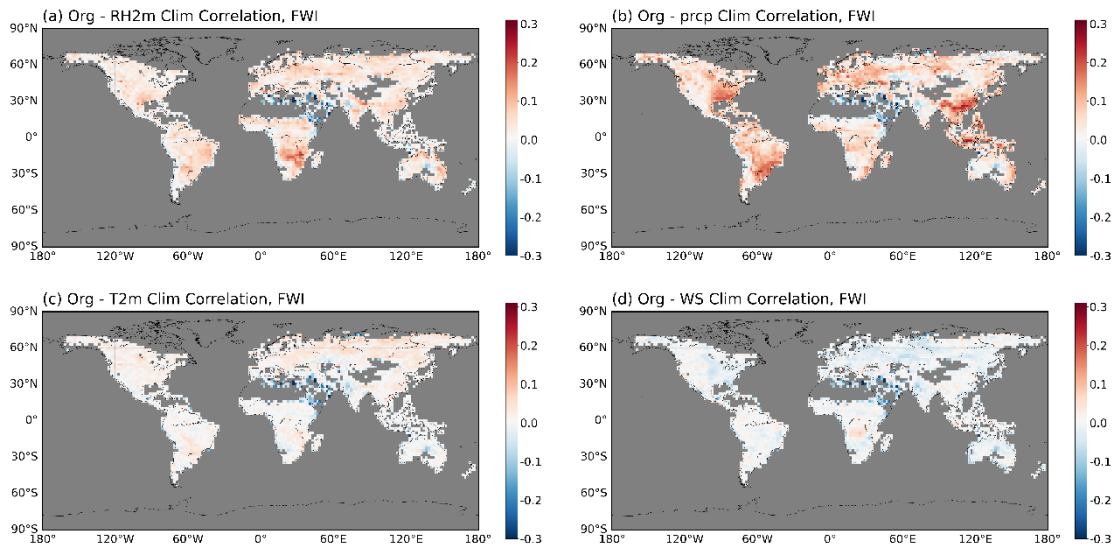

42

43

44

45

46

Supplementary Fig. S6. Difference in the correlation skill of the original FRP estimation in the FWI-based model from that by using (a) the RH2m, (b) PRCP, (c) T2m, and (d) WS10m as the daily climatological values.



47

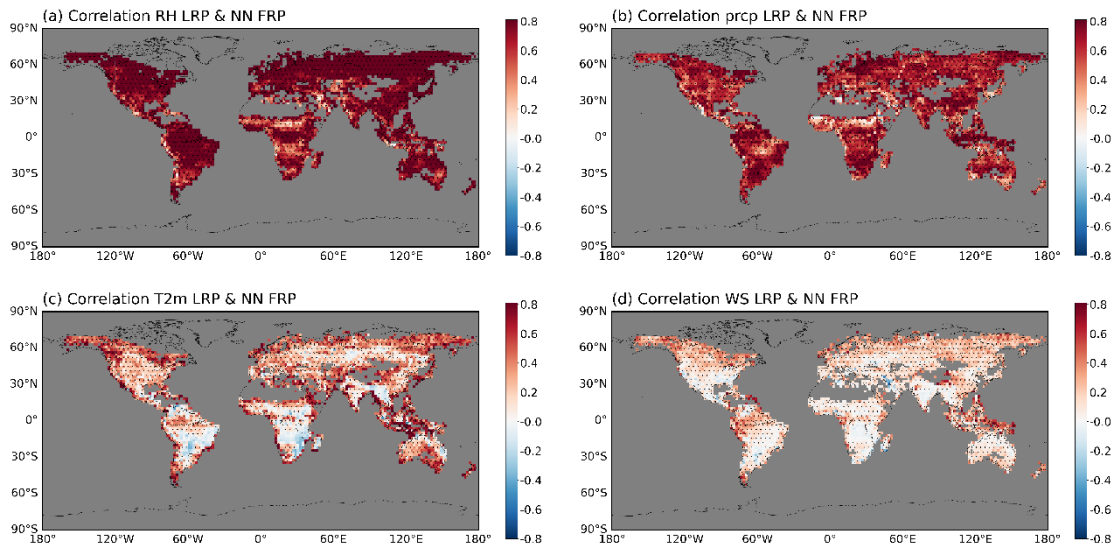

48

49

50

51

Supplementary Fig. S7. Correlation skill between the daily layer-wise relevance propagation (LRP) map and the estimated FRP in the FFNNs during the 2001–2020 period.

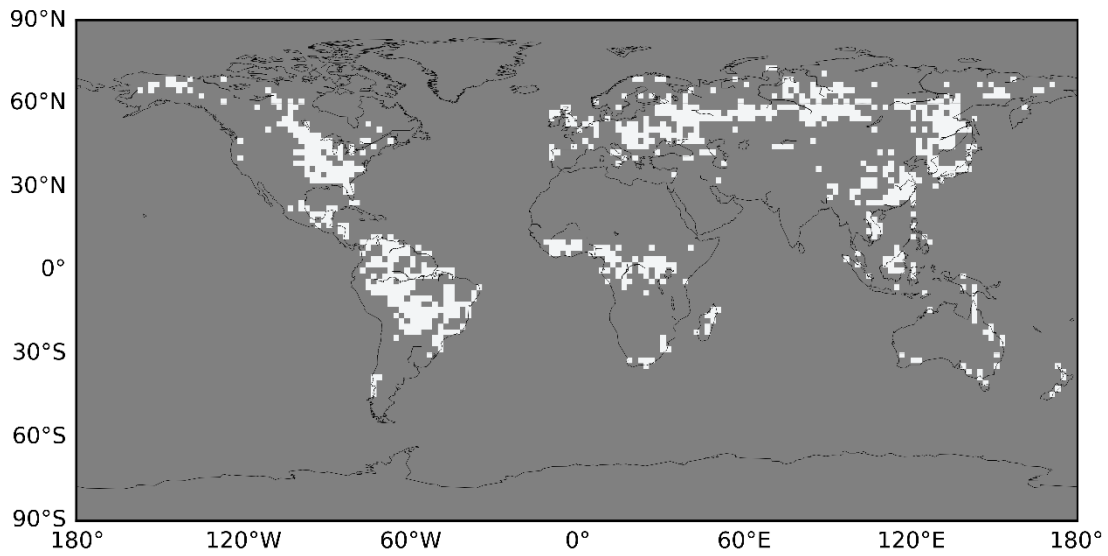

53

54 Supplementary Fig. S8. Grid points selected for bin-averaged FRP calculation in Fig.  
55 3 and Fig. 4, satisfying the following three conditions: (1) FRP correlation skill  
56 improvement in FFNNs over the FWI-based model greater than 0.1, (2) RH2m being  
57 the most influential meteorological variable for FRP estimation in FFNNs, and (3)  
58 PRCP being the most influential meteorological variable for FRP estimation in the  
59 FWI-based model.
