# Supplementary material for: Regionally optimized fire parameterizations using feed-forward neural networks
Source: Copernicus journal article supplement (doi:10.5194/esd-2023-26), 2023-08-30
Supplement: Supplementary file [file esd-2023-26-AC4-supplement.pdf]

# Regionally optimized fire parameterizations using feed-forward neural networks

Yoo-Geun Ham<sup>1\*</sup>, Seung-Ho Nam<sup>2</sup>, Geun-Hyeong Kang<sup>2</sup>, and Jin-Soo Kim<sup>3\*</sup>

<sup>1</sup> Department of Environmental Planning, Graduate School of Environmental Studies, Seoul National University, Seoul, South Korea

<sup>2</sup> Department of Oceanography, Chonnam National University, Gwangju, 61186, South Korea

<sup>3</sup> Low-Carbon and Climate Impact Research Centre, School of Energy and Environment, City University of Hong Kong, Tat Chee Ave, Kowloon Tong, Hong Kong, People's Republic of China

Correspondence to: Prof. Yoo-Geun Ham ([yoogeun@snu.ac.kr](mailto:yoogeun@snu.ac.kr)), and Prof. Jin-Soo Kim ([jinsoo.kim@cityu.edu.hk](mailto:jinsoo.kim@cityu.edu.hk))

The fire weather index (FWI) is a widely used metric for fire danger based on meteorological observations. However, due to its empirical formulation based on a specific regional relationship between the meteorological observations and fire intensity, the ability of the FWI to accurately represent global satellite-derived fire intensity observations is limited. In this study, we propose a fire parameterization method using feed-forward neural networks (FFNNs) for individual grids. These FFNNs for each grid point utilize four daily meteorological variables (2-meter relative humidity (RH2m), precipitation, 2-meter temperature, and wind speed) as inputs. The outputs of the FFNNs are satellite-derived fire radiative power (FRP) values. Applying the proposed FFNNs for fire parameterization during the 2001–2020 period revealed a marked enhancement in cross-validated skill compared to parameterization solely based on the FWI. This improvement was particularly notable across East Asia, Russia, the eastern US, southern South America, and central Africa. The sensitivity experiments demonstrated that the RH2m is the most critical variable in estimating the FRP and its regional differences via the FFNNs. Conversely, the FWI-based estimations were primarily influenced by precipitation. The FFNNs accurately captured the observed nonlinear RH2m-FRP and precipitation-FRP relationship compared to that simulated in the FWI-based model.

**Keywords:** fire parameterization, fire radiative power, fire weather index, feed-forward neural networks

34 **1. Introduction**

35 Wildfires are inflicting substantial terrestrial and economic impacts in numerous  
36 regions globally (Bowman et al., 2009). For example, In 2020, the United States  
37 experienced a total of US\$16.5 billion in damages due to wildfires, with over 10,000  
38 structures in California alone being damaged or completely destroyed (NOAA, 2021).  
39 The 2019-2020 wildfire season in Australia was exceptionally severe, causing smoke-  
40 related health costs of AU\$1.95 billion, including an estimated 429 premature deaths  
41 and over 4,700 hospital visits, a cost nearly nine times the median annual cost of  
42 AU\$211 million over the previous 19 years (Johnston et al., 2021). Therefore,  
43 monitoring and managing the risk of fire incidents at an early stage poses a significant  
44 challenge for each country in reducing casualties and economic losses (Vitolo et al.,  
45 2019).

46 As fire propagation is mainly determined by dryness after its ignition, spatially  
47 estimating and forecasting dryness enables the monitoring of fire hazards (Bistinas et  
48 al., 2014, Abatzoglou and Williams 2016). Facilitating the implementation of  
49 emergency measures to curb the expansion of uncontrollable large fires (Di Giuseppe  
50 et al., 2016, Bett et al., 2020, Haas et al., 2022). For this reason, in order to prevent fires,  
51 various techniques for quantifying and monitoring dryness have been developed and  
52 are being used. Indeed, the European Centre for Medium-Range Weather Forecasts  
53 (ECMWF) provides the Canadian Forest Fire Weather Index, the Australian McArthur  
54 Forest Fire Danger Index, and the Keetch-Byram Drought Index through the European  
55 Forest Fire Information System (EFFIS).

56 Among several operational fire danger indices, the Fire Weather Index (FWI)  
57 holds a prominent status as an indicator of potential fire intensity. Developed by the  
58 Canadian Forest Fire Danger Rating System (Van Wagner 1974, 1987), the FWI is  
59 based on four daily meteorological observations: near-surface air temperature, near-  
60 surface air relative humidity, wind speed, and precipitation. Fuel moisture codes are  
61 first determined from meteorological data to assign numerical ratings to the moisture  
62 content of the forest floor and other deceased organic matter. Afterward, the moisture  
63 codes are provided as an input of the fire behavior indices, such as the initial spread  
64 index and buildup index, to finally calculate the FWI, providing an estimation of  
65 wildfire intensity under given meteorological conditions (Vitolo et al., 2019).

66 Although this system has been shown to be globally applicable (Bedia et al.,  
67 2015, Abatzoglou et al., 2018), it was originally developed for the characterization of

68 evergreen pine stands in forested areas of Canada. Therefore, all links between fire  
69 moisture codes and fire behavior indices are optimized and parameterized for eastern  
70 Canada. However, regional fire dynamics vary significantly depending on its unique  
71 climatological states (Flannigan et al., 2005, Kim et al., 2019). For example, extensive  
72 deforestation fires in the Amazon are attributed to insufficient cumulative precipitation  
73 (Le Page et al., 2010), whereas Arctic fire activity is more sensitive to temperature and  
74 relevant timing of snowmelt (Kim et al., 2020); however, its regional differences would  
75 not be fully considered as the strength of FWI which is originally optimized and derived  
76 for physical characteristics of Canadian fire, while the relationship between the  
77 meteorological conditions and the fire activity varies significantly from regions to  
78 regions.

79 Artificial neural networks (ANN) have recently received extensive attention and  
80 continue expanding to various application fields, including wildfire research. The  
81 traditional ANN model with shallow neural networks, such as multilayer perceptron,  
82 and convolutional neural networks has been applied to predict the fire probability over  
83 the regional domain (Satir et al., 2016), or parameterize the fire occurrence (Zhang et  
84 al., 2021) from the meteorological variables. Despite previous literature demonstrating  
85 promising accuracy in estimating or predicting fire characteristics, the development of  
86 globally applicable ANN-based parameterization is still in its early stages. This is  
87 primarily due to the regional idiosyncrasies in the relationships between meteorological  
88 variables and fire activity, posing challenges for establishing global implementation.

89 To understand the varying sensitivities of wildfire activity to the meteorological  
90 variables from different regions, our study optimized fire parameterizations with  
91 satellite-derived fire radiative power (FRP) datasets based on feed-forward neural  
92 networks (FFNNs) in each region with fire activity records. Given that FFNNs follow  
93 the same structure and input variables as the FWI, the parameter values linking  
94 meteorological observations, fuel moisture code, and fire behavior indices are  
95 established for every  $1^\circ \times 1^\circ$  resolution grid box via FFNNs, thus foregoing raw  
96 parameterizations in the Canadian FWI. In addition to our novel FFNN-based model,  
97 we also conducted an in-depth examination of the FWI-based model with FRP for  
98 comparative purposes. To quantify the relative contributions of each meteorological  
99 parameter to the fire parameterizations, sensitivity experiments were conducted based  
100 on climatological values of meteorological observations.

101

## 102 **2. Data and Experimental Design**

### 103 2.1. Data

#### 104 2.1.1. Fire radiative power (FRP)

105 Given that the FWI was designed to estimate potential fire intensity, our analyses were  
106 based on satellite-derived FRP, a metric that represents the rate at which a fire emits  
107 energy in the form of thermal radiation. Specifically, daily FRP data was sourced from  
108 the Moderate Resolution Imaging Spectroradiometer (MODIS) Collection 6.1 dataset  
109 provided by the Fire Information for Resource Management System (FIRMS)  
110 ([https://firms.modaps.eosdis.nasa.gov/active\\_fire/](https://firms.modaps.eosdis.nasa.gov/active_fire/)) (Giglio et al., 2016). The period of  
111 the FRP data spans from 2001 to 2020. The dataset featured a spatial resolution of  $1^\circ \times 1^\circ$   
112 across the entire globe ( $0^\circ$ – $360^\circ$ E,  $90^\circ$ S– $90^\circ$ N), with values expressed in megawatts  
113 ( $10^6 \text{ J s}^{-1}$ ; MW). It is important to note that although products were generated for both  
114 land and ocean areas, we exclusively focused on land values, as FRP is directly  
115 associated with fire size and intensity over terrestrial surfaces.

116

#### 117 2.1.2. Meteorological observations

118 Meteorological observations are required as an input of the FWI and the FFNNs for the  
119 FRP parameterizations. In this study, we used **daily-averaged** 2 m air temperature  
120 (T2m), 2 m air relative humidity (RH2m), 10 m wind speed (WS10m), and precipitation  
121 (PRCP) from ERA5 reanalysis produced by the European Centre for Medium-Range  
122 Weather Forecasts (ECMWF) from 2001 to 2020 (Hersbach et al., 2020). The original  
123 horizontal resolution was a quarter degree but was interpolated to a  $1^\circ \times 1^\circ$  resolution  
124 over the entire globe ( $0^\circ$ – $360^\circ$ E,  $90^\circ$ S– $90^\circ$ N).

125

### 126 2.2. Models

#### 127 2.2.1. FWI-based model

128 **A FRP-estimation model based on the FWI was established as a baseline. The FWI is**  
129 **obtained from the daily averages of T2m, RH2m, WS10m, and PRCP, and the source**  
130 **code to produce the FWI was obtained from the Canadian Forest Service at**  
131 **<https://cfs.nrcan.gc.ca/publications/download-pdf/36461>. To match the systematic**  
132 **amplitude differences between the FWI and FRP using the different units, a linear**  
133 **regression coefficient of the FRP with respect to the FWI, which was separately**  
134 **calculated for each grid point, is multiplied to produce the FWI-based model. Therefore,**

135 the nonlinearity between the meteorological variable and the FRP in the baseline model  
136 is purely originated from the procedure to derive the FWI. A cross-validation strategy  
137 was adopted for the skill assessment. For more details, please refer to section 2.3.

138

### 139 2.2.2. FFNNs for FRP parameterization

140 The FFNNs employed for FRP parameterization consist of one input layer, three hidden  
141 layers, and one output layer (Figure 1). The input layer comprises four neurons  
142 corresponding to daily averages of T2m, RH2m, WS10m, and PRCP at a specific grid  
143 point. The output layer, on the other hand, encompasses a single neuron representing  
144 concurrent FRP estimation at the corresponding grid point. Notably, FFNNs are  
145 configured individually for each grid point. The first, second, and third hidden layers  
146 are composed of 64, 32, and 16 neurons, respectively. Activation functions are  
147 implemented utilizing the ReLU function, which is known to be powerful by  
148 introducing nonlinearity and solving the vanishing gradient issues (Agarap, 2018).  
149 Techniques such as batch normalization to normalize activations in intermediate layers  
150 of deep neural networks (Bjorck et al., 2018), and dropout to prevent an overfitting to  
151 the training data by randomly drop units (Srivastava et al., 2014) with a dropout rate  
152 of 0.2, are applied to enhance model robustness.

153 It should be noted that the meteorological observations serving as input for the FFNNs  
154 mirror those employed in the FWI. Thus, any disparities in estimation accuracy between  
155 the FFNNs and the FWI-based model solely stem from the FRP estimation algorithm.

156 The loss function of the FFNNs is defined as the root-mean-squared difference  
157 between the observed FRP ( $y$ ) and the estimated FRP ( $\hat{y}$ ) as follows.

$$158 \text{ Loss} = \sum_{n=1}^N (y_n - \hat{y}_n)^2$$

159 where  $N$  denotes the number of training samples. Total number of epochs for the  
160 training is set to 1,000, and early stopping is applied (Raskutti et al., 2014), once the  
161 validation loss is not decreased for 100 epochs. It is shown that both the training and  
162 validation loss is decreased with the increased epoch (Supplementary Fig. S1),  
163 indicating that the FFNNs to estimate the FRP are successfully formulated. Similar to  
164 the FWI-based model, a cross-validation strategy is adapted for the skill assessment  
165 (see section 2.3 for more details).

166

### 2.3. Cross-validation strategy for the skill assessment

The performance of both the FFNNs and the **FWI-based model** was assessed by adopting a cross-validation strategy. The dataset was partitioned into distinct subsets for testing, validation, and training purposes. The testing period was defined by dividing the entire period from 2001 to 2020 into **four-year** intervals. The validation dataset is defined as the last two years of each **four-year** interval, whereas the remaining data was used for training. For example, for the **1<sup>st</sup> Jan. 2001–31<sup>st</sup> Dec. 2004** test period, the models were trained using a **1<sup>st</sup> Jan. 2005– 31<sup>st</sup> Dec. 2018** dataset, whereas the data from **1<sup>st</sup> Jan. 2019– 31<sup>st</sup> Dec. 2020** was used for validation. Additional details on the selection of periods for training, validation, and testing are provided in Supplementary Table S1. After aligning all testing results from multiple sets of experiments with different period for training/validating/testing, the skill in estimating FRP was estimated using both FFNNs and **FWI-based models** across the 2001–2020 period. **We note that evaluating the skill of FFNN against FRP data may lead to an overestimation of its estimation abilities, given that the FFNN is trained using same type of data. Regrettably, the absence of ground-based observations on fire activity/intensity for the enough period deprives us of the opportunity to cross-reference FFNN-based FRP estimations with independent observations. The FRP anomalies, which were calculated by subtracting the estimated daily climatology during 2001–2020 period, were compared and assessed for the FRP estimation accuracy.**

### 3. FRP parameterization using the FFNNs

Figure 2 illustrates the correlation skill and root-mean-squared error (RMSE) between the observed FRP anomalies from 2001 to 2020 and the FRP anomalies estimated with FFNNs and the FWI-based model. The correlation skill of the FFNNs exceeded 0.6 over southern China, northern India, southern South America, the eastern US, southern Africa, western-central Russia, and maritime continents (Figure 2a). In contrast, the correlation skill of the FWI-based model fell below 0.6, with southern China and central Africa being the only exceptions (Figure 2b). Therefore, the FFNNs consistently exhibited superior correlation skills compared to the FWI-based model over most of the globe (Figure 2c). Notably, the improvement in the correlation skill of the FFNNs was statistically significant at a 95% confidence level, as determined using the method outlined by Zou (2007). This significance was particularly pronounced over East Asia, the entirety of Russia, the eastern US, southern South America, and central Africa.

201 The RMSE of the FRP estimations tended to be higher over the regions with high  
202 FRP climatology in both models (Supplementary Fig. S2). A clear distinction in the  
203 RMSE emerges upon comparing FFNNs and the FWI-based model; FFNNs  
204 demonstrate an RMSE below 1.5 MW across most regions (Figure 2d), while the FWI-  
205 based model predominantly registers RMSE values ranging between 1.5 and 1.8 MW  
206 (Figure 2e). Consequently, the global depiction of RMSE differences reveals negative  
207 values, illustrating the consistent superiority of FFNNs over the FWI-based model  
208 (Figure 2f).

209 The systematic improvement in the accuracy of the estimated FRP using the  
210 FFNNs was consistently robust when the skill is evaluated after excluding non-wildfire  
211 events (i.e., skill evaluation only when observed FRP > 0) (Supplementary Fig. S3) or  
212 when considering monthly-averaged FRP anomalies (Supplementary Fig. S4); both  
213 estimation of the fire events in daily scale and its interannual variations of the FRPs  
214 with FFNNs align more closely with the observed FRPs than the corresponding outputs  
215 of the FWI-based model.

216 To examine the realism of the temporal variation of the estimated FRP in more  
217 detail, Figure 3 shows time-series of the yearly-averaged observed and estimated FRP  
218 over Brazil (Figure 3a), Africa (Figure 3b), Siberia (Figure 3c), and Southern China  
219 (Figure 3d). The correlation skill across the various regions consistently exhibited  
220 higher correlation skill. Interestingly, the daily evolution and its intensity estimation for  
221 the record-breaking wildfire events over the Brazil in 2019 (Brando et al., 2020) (Figure  
222 3e), Africa in 2016 (Verhegghen et al., 2016) (Figure 3f), Siberia in 2003 (Huang et al.,  
223 2009) (Figure 3g), and southern China in 2007 (Cao et al., 2017) (Figure 3h) are  
224 consistently better estimated in the FFNNs. These findings highlight the superiority of  
225 FFNNs over the FWI-based model not only in estimating overall variations of the fire  
226 intensity, and its detailed evolution and intensity of record-breaking wildfire event  
227 worldwide by successfully exploring the relationship between the FRP and the  
228 meteorological observations.

229 To identify the main factors that contributed to the superior accuracy of the  
230 FFNNs, sensitivity experiments were conducted by fixing one of the meteorological  
231 observations to the daily climatological values (Figure 4); for example, in the RH2m  
232 Clim experiment, the prescribed values of RH2m as an input of the FFNN is the daily  
233 climatology during the whole period (i.e., 2001-2020), therefore, its year-to-year  
234 variations in the RH2m is removed. Then, the correlation skill difference between the

235 control simulation, that prescribes all input values at the corresponding date, and the  
 236 RH2m Clim experiment is calculated to assess the importance of the RH2m in FRP  
 237 parameterization. It clearly indicates that the RH2m are the main factors influencing  
 238 the accuracy of the FRP estimations in the FFNNs. For example, the correlation skill  
 239 difference between the original estimation and the estimation with the climatological  
 240 RH2m was close to 0.5 over most of the regions where the original FRP estimations  
 241 exhibited high skill (Figure 4a). On the other hand, substituting PRCP with its  
 242 climatological value had a negligible impact on the FFNN-based approach (Figure 4b).  
 243 Therefore, RH2m was the dominant variable influencing FRP estimations via the  
 244 FFNNs method over most of the globe except for a few regions (Figure 4c). The  
 245 correlation skill also remained relatively unaffected when daily climatological values  
 246 of WS10m, T2m were considered for the FRP estimations using the FFNNs  
 247 (Supplementary Fig. S5).

248 Conversely, when employing the FWI-based model, the alteration in FRP  
 249 correlation skill is more pronounced upon substituting PRCP with its daily  
 250 climatological values. In regions such as southern China, northern India, southeastern  
 251 South America, and the eastern US, the correlation skill decrease is between 0.2 and  
 252 0.3 due to this substitution. In contrast, replacing RH2m with its climatology results in  
 253 correlation skill differences of less than 0.1 (Figure 4d and 4e). These findings  
 254 underscore the importance of PRCP as the meteorological variable with the greatest  
 255 influence on FRP estimation using the FWI (Figure 4f). The correlation skill also  
 256 remained relatively unaffected when daily climatological values of WS10m, T2m were  
 257 considered for the FRP estimations (Supplementary Fig. S6).

258 To support our arguments that the RH2m is most importance factor in the FFNNs,  
 259 we adapted the layer-wise relevance propagation (LRP) technique (Bach et al., 2015;  
 260 Barns et al., 2020; Toms et al., 2020), which is widely used for understanding the  
 261 relevance of individual features or neurons in neural networks. It provides a so-called  
 262 relevance score  $R$  for each variable, which linearly decompose the importance of each  
 263 input variables as follows by propagating the output value backward toward the input  
 264 variables using a chain rule.

265 
$$f(RH2m, PRCP, T2m, WS10m) = R_{RH2m} + R_{PRCP} + R_{T2m} + R_{WS10m}$$
  
 266 where  $f$  is a nonlinear model (i.e., FFNNs) to derive the FRP, and  $R_{RH2m}$ ,  $R_{PRCP}$ ,  $R_{T2m}$ ,  
 267  $R_{WS10m}$  is a relevance score of RH2m, PRCP, T2m, and WS10m, respectively. The



268 relative importance of any particular variable to the estimated FRP can be quantified  
269 by calculating the degree of the similarity between the output value and the relevance  
270 scores. For this purpose, we obtained the relevance score of each variable for each day  
271 during the whole testing period (i.e., 2001-2020) and calculated the correlation with the  
272 estimated FRP in the FFNNs (Figure 5). This analysis supports our previous notion that  
273 the RH2m is the most sensitive factor influencing FRP estimation in FFNNs, with the  
274 contributions of other meteorological parameters being comparatively minor.

275 The dramatic disparity in the relative contributions of RH2m and PRCP between  
276 the two models indicates that the factors that drive the predictive performance of the  
277 two models were different. Therefore, the relationship between these two key  
278 meteorological observations and the FRP estimations will be further explored in the  
279 next section to gain insights into the factors that determine the superior performance of  
280 the FFNN-based approach.

#### 281 282 **4. Physical explanations of the superior performance of FFNNs**

283 To confirm that the superior performance of the FFNNs is associated with the  
284 differences in the relationship between the RH2m and the estimated FRP between the  
285 FFNNs and the FWI-based models, we selected grid points that satisfy the following  
286 three conditions: (1) an FRP correlation skill improvement in FFNNs over FWI-based  
287 models is greater than a threshold value (i.e., 0.05 in this case), (2) RH2m is the most  
288 sensitive variable for FRP estimation in FFNNs (green color in Fig. 2c), and (3) PRCP  
289 is the most sensitive variable in the FWI-based model (blue color in Fig. 2f). A total of  
290 852 grid points were selected based on these criteria, which accounts for approximately  
291 25.1% of total land grid points and 49.7% of total grid points whose correlation skill  
292 improvement in the FFNNs is greater than a threshold value of 0.05. The selected grid  
293 points are located over southern China, Russia, central Africa, the eastern US, and  
294 central-northern South America (Figure 6a). We note that a threshold of 0.1 for  
295 correlation skill improvement would not change the general conclusion, which will be  
296 discussed in the following paragraph.

297 Figure 6b-g illustrates the averaged FRP for each RH2m bin with a 10% interval.  
298 Our findings indicated that FRP exhibits a decrease when RH2m surpasses 30% (Figure  
299 6b). Therefore, the difference in the FRP values in the higher RH2m bin from that in  
300 the lower RH2m bin exhibited negative values (Figure 6c). This relationship reflects  
301 the well-known impact of relative humidity on combustion (Papagiannaki et al., 2020;

302 Ying et al., 2021), as oxygen availability is constrained, resulting in reduced  
303 combustion rate and lowered FRP. Additionally, higher humidity can indicate the  
304 presence of moisture in the fuel, such as plants or other vegetation, thereby impeding  
305 fire propagation and further decreasing the FRP values.

306 Interestingly, in instances where RH2m falls below 30%, FRP tends to increase  
307 with higher RH2m values. Although this proportional relationship between relative  
308 humidity and fire activity is relatively uncommon, it can be occurred over the fuel-  
309 limited landscape, or the regions of following extended periods of drought or low  
310 humidity; Abatzoglou and Kolden (2013) showed that the positive correlation between  
311 the soil moisture and the burned area is enhanced in non-forested regions. This is  
312 similarly found in Xystrakis et al. (2014), which argued that the increased precipitation  
313 is associated with the build-up of the fuel, which eventually contribute to increase the  
314 burned area.

315 The FFNNs accurately simulated the aforementioned nonlinear relationship  
316 between the RH2m and the FRP (Figure 6d and 6e). In cases where  $RH2m < 30\%$ , FRP  
317 increases with rising RH2m; for  $RH2m > 30\%$ , FRP diminishes as RH2m rises. The  
318 consistency between the estimated and observed FRP values at each bin further  
319 supports our previous results, demonstrating the successful application of FFNNs in  
320 FRP parameterization.

321 In contrast, the FWI-based FRP estimations exhibit a linear inverse relationship  
322 between the RH2m and the FRP. Specifically, FRP decreases continuously with  
323 increasing RH2m (Figures 6f and 6g). This unrealistic representation, particularly in  
324 dry regimes, demonstrates that the observed nonlinear RH2m-FRP relationship was not  
325 faithfully captured in the FWI-based model. Furthermore, the FWI-based estimations  
326 tended to overestimate FRP in low RH2m bins (i.e.,  $RH2m < 30\%$ ) and underestimate  
327 it in high RH2m bins (i.e.,  $RH2m > 60\%$ ), which underscores the systematic biases in  
328 the FRP estimations in the FWI-based model.

329 Next, we assessed the relationship between daily-averaged PRCP and the FRP  
330 values (Figure 7). In both the observed FRP values and those estimated using FFNNs  
331 and FWI-based models, PRCP tended to inhibit fire events, causing FRP values to  
332 decrease with rising PRCP (Parks et al., 2014; Chen et al. 2014; Holden et al., 2018).  
333 In the observational data (Figure 7a), FRP reaches its maximum at 1.9 MW within the  
334 lowest PRCP bin (i.e.,  $PRCP < 0.1$  mm/day), after which it sharply decreases to  
335 approximately 1 MW in the subsequent bin (i.e.,  $0.1$  mm/day  $< PRCP < 0.2$  mm/day).

336 Afterward, it experiences a gradual decrease with increasing PRCP when PRCP is  
337 below 3 mm/day. However, for PRCP values exceeding 3 mm/day, the extent to which  
338 FRP decreases with higher PRCP becomes less pronounced, as higher precipitation  
339 does not proportionally reduce ignition likelihood (Oliveras et al., 2014). This leads to  
340 sustained FRP values above a certain threshold (i.e., 0.5 MW) for PRCP > 3 mm/day.  
341 The spatially averaged FRP distribution in instances where PRCP > 3 mm/day  
342 maintains moderate values, ranging from 1 to 2 MW over regions such as Mexico,  
343 Colombia, central South America, central Africa, central Western Asia, Australia, and  
344 the maritime continent (Figure 7b).

345 FFNNs accurately simulated the observed relationship between the FRP and the  
346 PRCP, with the estimated FRP in FFNNs exhibiting high values within the smallest  
347 PRCP bins (approximately 1.75 MW), which decreased as PRCP increased when PRCP  
348 was below 3 mm/day (Figure 7c). The spatial distribution of the averaged FRP for the  
349 cases where PRCP > 3 mm/day was also similar to the observed values (Figure 7d).  
350 Conversely, FRP estimation in the FWI-based model tended to be underestimated,  
351 particularly in bins with higher PRCP (Figure 7e). For instance, bins with PRCP < 0.5  
352 mm/day exhibited an underestimation of approximately 0.25 MW, whereas  
353 underestimations of over 0.5 MW, and nearly 0 MW, were evident when PRCP > 3  
354 mm/day. This is further evidenced by the spatially averaged FRP distribution for PRCP  
355 > 3 mm/day, which is almost negligible worldwide (Figure 7f).

356 As a result, the regression coefficient between the FRP estimation and the PRCP  
357 is systematically greater in the FWI-based model. For observations, the quadratic  
358 coefficient is  $0.022 \text{ MW}/(\text{mm}/\text{day})^2$  (black in Figure 7a), and that for the FFNNs  $0.023$   
359  $\text{MW}/(\text{mm}/\text{day})^2$  (black in Figure 7c), denoting similar amplitude. On the other hand,  
360 the FWI-based model is  $0.036 \text{ MW}/(\text{mm}/\text{day})^2$ , which is almost twice to that of the  
361 others (black in Figure 7e). This suggests that the FWI-based model is more responsive  
362 to changes in PRCP, resulting in a more pronounced FRP decrease with increasing  
363 PRCP. This excessive sensitivity in the estimated FRP to PRCP changes can contribute  
364 to the excessive influence of PRCP on the FRP estimations in the FWI-based model, as  
365 shown in Figure 4f.

366

## 367 **5. Summary and Discussion**

368 In this study, we developed a parameterization method using FFNNs to estimate  
369 global gridded FRP fields from meteorological variables. In the FFNNs, four daily

370 meteorological observations, namely 2 m temperature, 2 m specific humidity, wind  
371 speed, and precipitation, were used as the input to predict the daily FRP output. The  
372 cross-validated FRP parameterization results during 2001–2020 exhibited an improved  
373 skill in estimating the observed FRP compared to the **FWI-based model**. The  
374 improvement in the parameterization accuracy in terms of the correlation skill and the  
375 RMSE was observed over most of the globe and was particularly prominent over East  
376 Asia, Russia, the eastern US, southern South America, and central Africa. This  
377 indicates that FFNNs can more effectively capture the nonlinear relationship between  
378 meteorological observations and FRP compared to the commonly employed fire index.

379 **To identify the mechanism of the skill improvement in the FFNNs**, a series of  
380 sensitivity experiments were performed by replacing each variable with the daily  
381 climatological values, and our findings demonstrated that the 2 m relative humidity  
382 (RH2m) was the most critical variable influencing the outcomes of the FFNNs over  
383 most of the globe. On the other hand, in the FWI-based model, PRCP plays a more  
384 substantial role in FRP estimation. The observed nonlinear relationship between the  
385 RH2m and the FRP is well simulated in the FFNNs; both the observation and the  
386 FFNNs exhibited a negative relationship in the wet regime (i.e.,  $RH2m > 30\%$ ),  
387 whereas a positive relationship was observed in the dry regime (i.e.,  $RH2m < 30\%$ ).  
388 Likewise, FFNNs accurately simulated the observed impact of PRCP on FRP reduction.

389 In contrast, the FWI-based model simulated a linear negative relationship  
390 between the FRP and the RH2m, which caused systematic errors in estimating the FRP,  
391 particularly in the dry regime. Moreover, the FWI-based model exaggerates the degree  
392 of FRP reduction with increasing PRCP, which contributes to the stronger contribution  
393 of PRCP to the FRP estimations compared to those obtained with the FFNNs. This  
394 discrepancy underscores the applicability of FFNNs in understanding the intricate  
395 relationship between meteorological observations and FRP, offering insights for  
396 refining the algorithm for global FWI calculations. While process-based fire models are  
397 valuable for estimating fire activity changes due to greenhouse gas warming, their  
398 performance is comparatively less robust compared to empirical models (Rabin et al.,  
399 2015; Hantson et al., 2016). Therefore, FFNN parameterizations could enhance  
400 process-based land surface models, yielding reliable fire activity predictions and  
401 insights into their evolution under greenhouse gas warming scenarios.

402 Current FFNNs solely leverage meteorological observations for FRP  
403 parameterization to ensure equitable comparison with the FWI-based model. However,

404 the incorporation of land surface observations such as soil moisture could optimize  
405 FFNNs for simulating fire events more effectively. This provides an opportunity to  
406 reduce the significant uncertainties in predicting fire events in parameterizing fires in  
407 earth system models, ultimately mitigating potential losses from natural hazards.

408

#### 409 **References**

- 410 Abatzoglou, J. T. and Kolden, C. A.: Relationships between climate and macroscale  
411 area burned in the western United States, *Int. J. Wildland Fire*, 22, 1003–1020,  
412 <https://doi.org/10.1071/WF13019>, 2013.
- 413 Abatzoglou, J. T. and Williams, A. P.: Impact of anthropogenic climate change on  
414 wildfire across western US forests, *Proc. Natl. Acad. Sci. U.S.A.*, 113, 11770–  
415 11775, <https://doi.org/10.1073/pnas.1607171113>, 2016.
- 416 Abatzoglou, J. T., Williams, A. P., Boschetti, L., Zubkova, M., and Kolden, C. A.:  
417 Global patterns of interannual climate–fire relationships, *Glob. Chang. Biol.* 24,  
418 5164–5175, <https://doi.org/10.1111/gcb.14405>, 2018.
- 419 Agarap, A. F. Deep learning using rectified linear units (relu). *arXiv preprint*  
420 *arXiv:1803.08375*, 2018.
- 421 Bach, S., Binder, A., Montavon, G., Klauschen, F., Müller, K.-R., and Samek, W.: On  
422 pixel-wise explanations for non-linear classifier decisions by layer-wise relevance  
423 propagation, *PLoS One* 10, 1–46, <https://doi.org/10.1371/journal.pone.0130140>,  
424 2015
- 425 Barnes, E. A., Toms, B., Hurrell, J. W., Ebert-Uphoff, I., Anderson, C., and Anderson,  
426 D.: Indicator patterns of forced change learned by an artificial neural network, *J.*  
427 *Adv. Model. Earth Syst.*, 12, e2020MS002195,  
428 <https://doi.org/10.1029/2020MS002195>, 2020.
- 429 Bedia, J., Herrera, S., Gutiérrez, J. M., Benali, A., Brands, S., Mota, B., and Moreno, J.  
430 M.: Global patterns in the sensitivity of burned area to fire-weather: implications  
431 for climate change, *Agric. For. Meteorol.*, 214, 369–79, [https://doi.org/](https://doi.org/10.1016/j.agrformet.2015.09.002)  
432 [10.1016/j.agrformet.2015.09.002](https://doi.org/10.1016/j.agrformet.2015.09.002), 2015.
- 433 Bett, P. E., Williams, K. E., Burton, C., Scaife, A. A., Wiltshire, A. J., and Gilham, R.:  
434 Skillful seasonal prediction of key carbon cycle components: NPP and fire risk,  
435 *Environ. Res. Commun.*, 2, 055002, <https://doi.org/10.1088/2515-7620/ab8b29>,  
436 2020.
- 437 Bistinas, I., Harrison, S. P., Prentice, I. C., and Pereira, J. M. C.: Causal relationships  
438 versus emergent patterns in the global controls of fire frequency, *Biogeosciences*,  
439 11, 5087–5101, <https://doi.org/10.5194/bg-11-5087-2014>, 2014.
- 440 Bowman, D. M., Balch, J. K., Artaxo, P., Bond, W. J., Carlson, J. M., Cochrane, M.  
441 A., ... & Pyne, S. J. (2009). Fire in the Earth system. *science*, 324(5926), 481-484.
- 442 Brando, P., Macedo, M., Silvério, D., Rattis, L., Paolucci, L., Alencar, A., ... & Amorim,  
443 C. (2020). Amazon wildfires: Scenes from a foreseeable disaster. *Flora*, 268,  
444 151609.
- 445 Cao, Y., Wang, M., & Liu, K. (2017). Wildfire susceptibility assessment in Southern  
446 China: A comparison of multiple methods. *International Journal of Disaster Risk*  
447 *Science*, 8, 164-181.
- 448 Bjorck, N., Gomes, C. P., Selman, B., & Weinberger, K. Q. (2018). Understanding  
449 batch normalization. *Advances in neural information processing systems*, 31.

450 Chen, F., Niu, S., Tong, X., Zhao, J., Sun, Y., and He, T.: The impact of precipitation  
451 regimes on forest fires in Yunnan Province, Southwest China., *Sci. World J.*, 2014,  
452 326782, <https://doi.org/10.1155/2014/326782>, 2014.

453 Di Giuseppe, F., Rémy, S., Pappenberger, F., & Wetterhall, F.: Using the Fire Weather  
454 Index (FWI) to improve the estimation of fire emissions from fire radiative power  
455 (FRP) observations, *Atmospheric Chem. Phys.*, 18, 5359–5370,  
456 <https://doi.org/10.5194/acp-18-5359-2018>, 2018.

457 Di Giuseppe, F., Pappenberger, F., Wetterhall, F., Krzeminski, B., Camia, A., Libertá,  
458 G., and San Miguel, J.: The potential predictability of fire danger provided by  
459 numerical weather prediction, *J. Appl. Meteorol. Climatol.*, 55, 2469–2491,  
460 <https://doi.org/10.1175/JAMC-D-15-0297.1>, 2016.

461 Duncan, B. N., Martin, R. V., Staudt, A. C., Yevich, R., and Logan, J. A.: Interannual  
462 and seasonal variability of biomass burning emissions constrained by satellite  
463 observations, *J. Geophys. Res.*, 108, 4100, <https://doi.org/10.1029/2002JD002378>,  
464 2003.

465 Flannigan, M. D., Logan, K. A., Amiro, B. D., Skinner, W. R., and Stocks, B. J.: Future  
466 area burned in Canada, *Clim. Change*, 72, 1–16, [https://doi.org/10.1007/s10584-](https://doi.org/10.1007/s10584-005-5935-y)  
467 005-5935-y, 2005.

468 Giglio, L., Schroeder, W., and Justice, C. O.: The collection 6 MODIS active fire  
469 detection algorithm and fire products. *Remote Sensing of Environment*, 178, 31–  
470 41, <https://doi.org/10.1016/j.rse.2016.02.054>, 2016.

471 Grillakis, M., Voulgarakis, A., Rovithakis, A., Seiradakis, K. D., Koutroulis, A., Field,  
472 R. D., Kasoar, M., Papadopoulos, A., and Lazaridis, M.: Climate drivers of global  
473 wildfire burned area, *Environ. Res. Lett.*, 17, 045021,  
474 <https://doi.org/10.1088/1748-9326/ac5fa1>, 2022.

475 Haas, O., Prentice, I. C., and Harrison, S. P.: Global environmental controls on wildfire  
476 burnt area, size, and intensity, *Environ. Res. Lett.*, 17, 065004,  
477 <https://doi.org/10.1088/1748-9326/ac6a69>, 2022.

478 Hantson, S., Arneeth, A., Harrison, S. P., Kelley, D. I., Prentice, I. C., Rabin, S. S.,  
479 Archibald, S., Mouillot, F., Arnold, S. R., Artaxo, P., Bachelet, D., Ciais, P.,  
480 Forrest, M., Friedlingstein, P., Hickler, T., Kaplan, J. O., Kloster, S., Knorr, W.,  
481 Lasslop, G., Li, F., Mangeon, S., Melton, J. R., Meyn, A., Sitch, S., Spessa, A.,  
482 van der Werf, G. R., Voulgarakis, A., and Yue, C.: The status and challenge of  
483 global fire modelling, *Biogeosciences*, 13, 3359–3375, [https://doi.org/10.5194/bg-](https://doi.org/10.5194/bg-13-3359-2016)  
484 13-3359-2016, 2016.

485 Hersbach, H., Bell, B., Berrisford, P., Hirahara, S., Horányi, A., Muñoz-Sabater, J.,  
486 Nicolas, J., Peubey, C., Radu, R., Schepers, D., Simmons, A., Soci, C., Abdalla,  
487 S., Abellan, X., Balsamo, G., Bechtold, P., Biavati, G., Bidlot, J., Bonavita, M.,  
488 De Chiara, G., Dahlgren, P., Dee, D., Diamantakis, M., Dragani, R., Flemming, J.,  
489 Forbes, R., Fuentes, M., Geer, A., Haimberger, L., Healy, S., Hogan, R. J., Hórn,  
490 E., Janisková, M., Keeley, S., Laloyaux, P., Lopez, P., Lupu, C., Radnoti, G., de  
491 Rosnay, P., Rozum, I., Vamborg, F., Villaume, S., and Thépaut, J.-N.: The ERA5  
492 Global Reanalysis, *Q. J. Roy. Meteorol. Soc.*, 146, 1999–2049,  
493 <https://doi.org/10.1002/qj.3803>, 2020.

494 Holden, Z. A., Swanson, A., Luce, C. H., Jolly, W. M., Maneta, M., Oyler, J. W.,  
495 Warren, D. A., Parsons, R., and Affleck, D.: Decreasing fire season precipitation  
496 increased recent western US forest wildfire activity, *P. Natl. Acad. Sci. USA*, 115,  
497 201802316, <https://doi.org/10.1073/pnas.1802316115>, 2018.

498 Huang, S., Siegert, F., Goldammer, J. G., & Sukhinin, A. I. (2009). Satellite-derived  
499 2003 wildfires in southern Siberia and their potential influence on carbon  
500 sequestration. *International Journal of Remote Sensing*, 30(6), 1479-1492.

501 Johnston, F.H., Borchers-Arriagada, N., Morgan, G.G., Jalaludin, B., Palmer, A. J.,  
502 Williamson, G. J., and Bowman, D. M. J. S.: Unprecedented health costs of  
503 smoke-related PM2.5 from the 2019–20 Australian megafires, *Nat. Sustain.*, 4,  
504 42–47, <https://doi.org/10.1038/s41893-020-00610-5>, 2021

505 Jones, M. W., Abatzoglou, J. T., Veraverbeke, S., Andela, N., Lasslop, G., Forkel, M.,  
506 Smith, A. J. P., Burton, C., Betts, R. A., van der Werf, G. R., Sitch, S., Canadell,  
507 J. G., Santín, C., Kolden, C., Doerr, S. H., and Le Quéré, C.: Global and regional  
508 trends and drivers of fire under climate change, *Rev. Geophys.*, 60,  
509 e2020RG000726, <https://doi.org/10.1029/2020RG000726>, 2022.

510 Kim, J. S., Jeong, S. J., Kug, J. S., and Williams, M.: Role of local air-sea interaction  
511 in fire activity over equatorial Asia, *Geophys. Res. Lett.*, 46, 14789–14797,  
512 <https://doi.org/10.1029/2019GL085943>, 2019.

513 Kim, J. S., Kug, J. S., Jeong, S. J., Park, H., and Schaepman-Strub, G.: Extensive fires  
514 in southeastern Siberian permafrost linked to preceding Arctic Oscillation, *Sci.*  
515 *Adv.*, 6, eaax3308, <https://doi.org/10.1126/sciadv.aax3308>, 2020.

516 Laurent, P., Mouillot, F., Moreno, M. V., Yue, C., and Ciais, P.: Varying relationships  
517 between fire radiative power and fire size at a global scale, *Biogeosciences*, 16,  
518 275–288, <https://doi.org/10.5194/bg-16-275-2019>, 2019.

519 Le Page, Y., van der Werf, G. R., Morton, D. C., and Pereira, J. M. C.: Modeling fire-  
520 driven deforestation potential in Amazonia under current and projected climate  
521 conditions, *J. Geophys. Res.-biogeosciences*, 115, G03012,  
522 <https://doi.org/10.1029/2009JG001190>, 2010.

523 NOAA (Natl. Ocean. Atmos. Assoc.). 2021. Billion-dollar weather and climate  
524 disasters 2021. *Natl. Cent. Environ. Inf.*, Natl. Ocean. Atmos. Assoc., Washington,  
525 DC. <https://www.ncdc.noaa.gov/billions/>

526 Oliveras, I., Anderson, L. O., and Malhi, Y.: Application of remote sensing to  
527 understanding fire regimes and biomass burning emissions of the tropical Andes,  
528 *Global Biogeochem. Cy.*, 28, 480– 496, <https://doi.org/10.1002/2013GB004664>,  
529 2014.

530 Papagiannaki, K., Giannaros, T. M., Lykoudis, S., Kotroni, V., & Lagouvardos, K.  
531 (2020). Weather-related thresholds for wildfire danger in a Mediterranean region:  
532 The case of Greece. *Agricultural and Forest Meteorology*, 291, 108076.

533 Parks, S. A., Parisien, M.-A., Miller, C., and Dobrowski, S. Z.: Fire Activity and  
534 Severity in the Western US Vary along Proxy Gradients Representing Fuel  
535 Amount and Fuel Moisture, *PLoS ONE*, 9, e99699,  
536 <https://doi.org/10.1371/journal.pone.0099699>, 2014.

537 Rabin, S. S., Melton, J. R., Lasslop, G., Bachelet, D., Forrest, M., Hantson, S., Kaplan,  
538 J. O., Li, F., Mangeon, S., Ward, D. S., Yue, C., Arora, V. K., Hickler, T., Kloster,  
539 S., Knorr, W., Nieradzic, L., Spessa, A., Folberth, G. A., Sheehan, T., Voulgarakis,  
540 A., Kelley, D. I., Prentice, I. C., Sitch, S., Harrison, S., and Arneeth, A.: The Fire  
541 Modeling Intercomparison Project (FireMIP), phase 1: experimental and  
542 analytical protocols with detailed model descriptions, *Geosci. Model Dev.*, 10,  
543 1175–1197, <https://doi.org/10.5194/gmd-10-1175-2017>, 2017.

544 Raskutti, G., Wainwright, M. J., & Yu, B. (2014). Early stopping and non-parametric  
545 regression: an optimal data-dependent stopping rule. *The Journal of Machine*  
546 *Learning Research*, 15(1), 335-366.

- 547 Satir, O., Berberoglu, S., & Donmez, C. (2016). Mapping regional forest fire  
548 probability using artificial neural network model in a Mediterranean forest  
549 ecosystem. *Geomatics, Natural Hazards and Risk*, 7(5), 1645-1658.
- 550 Srivastava, N., Hinton, G., Krizhevsky, A., Sutskever, I., & Salakhutdinov, R. (2014).  
551 Dropout: a simple way to prevent neural networks from overfitting. *The journal*  
552 *of machine learning research*, 15(1), 1929-1958.
- 553 Toms, B. A., Barnes, E. A., and Ebert-Uphoff, I.: Physically interpretable neural  
554 networks for the geosciences: Applications to Earth system variability, *J. Adv.*  
555 *Model. Earth Syst.*, 12, e2019MS002002, <https://doi.org/10.1029/2019ms002002>,  
556 2020.
- 557 Van Wagner, C. E.: Structure of the Canadian forest fire weather index, *Can. For. Serv.*  
558 *Publ.*, 1333, 44 pp., 1974.
- 559 Van Wagner, C. E.: Development and structure of the Canadian forest fire weather  
560 index system, Canadian Forestry Service, Headquarters, Ottawa, Canada, Forestry  
561 Technical Report, vol. 35, 35 pp., 1987.
- 562 Verhegghen, A., Eva, H., Ceccherini, G., Achard, F., Gond, V., Gourlet-Fleury, S., &  
563 Cerutti, P. O. (2016). The potential of Sentinel satellites for burnt area mapping  
564 and monitoring in the Congo Basin forests. *Remote Sensing*, 8(12), 986.
- 565 Vitolo, C., Di Giuseppe, F., Krzeminski, B., and San-Miguel-Ayanz, J.: A 1980–2018  
566 global fire danger re-analysis dataset for the Canadian Fire Weather Indices, *Scient.*  
567 *Data*, 6, 190032, <https://doi.org/10.1038/sdata.2019.32>, 2019.
- 568 Ying, L., Cheng, H., Shen, Z., Guan, P., Luo, C., & Peng, X. (2021). Relative humidity  
569 and agricultural activities dominate wildfire ignitions in Yunnan, Southwest China:  
570 Patterns, thresholds, and implications. *Agricultural and Forest Meteorology*, 307,  
571 108540.
- 572 Zhang, G., Wang, M., & Liu, K. (2021). Deep neural networks for global wildfire  
573 susceptibility modelling. *Ecological Indicators*, 127, 107735.
- 574 Zou, G.: Toward using confidence intervals to compare correlations, *Psychol. Methods*,  
575 12, 399–413, <https://doi.org/10.1037/1082-989X.12.4.399>, 2007.



576

### Neural Network Configuration

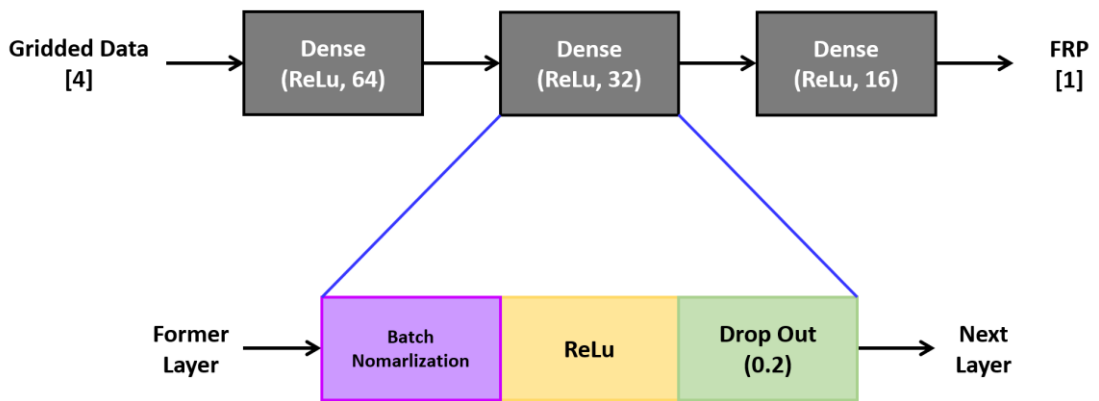

577

578 Figure 1. Configuration of the FFNNs.

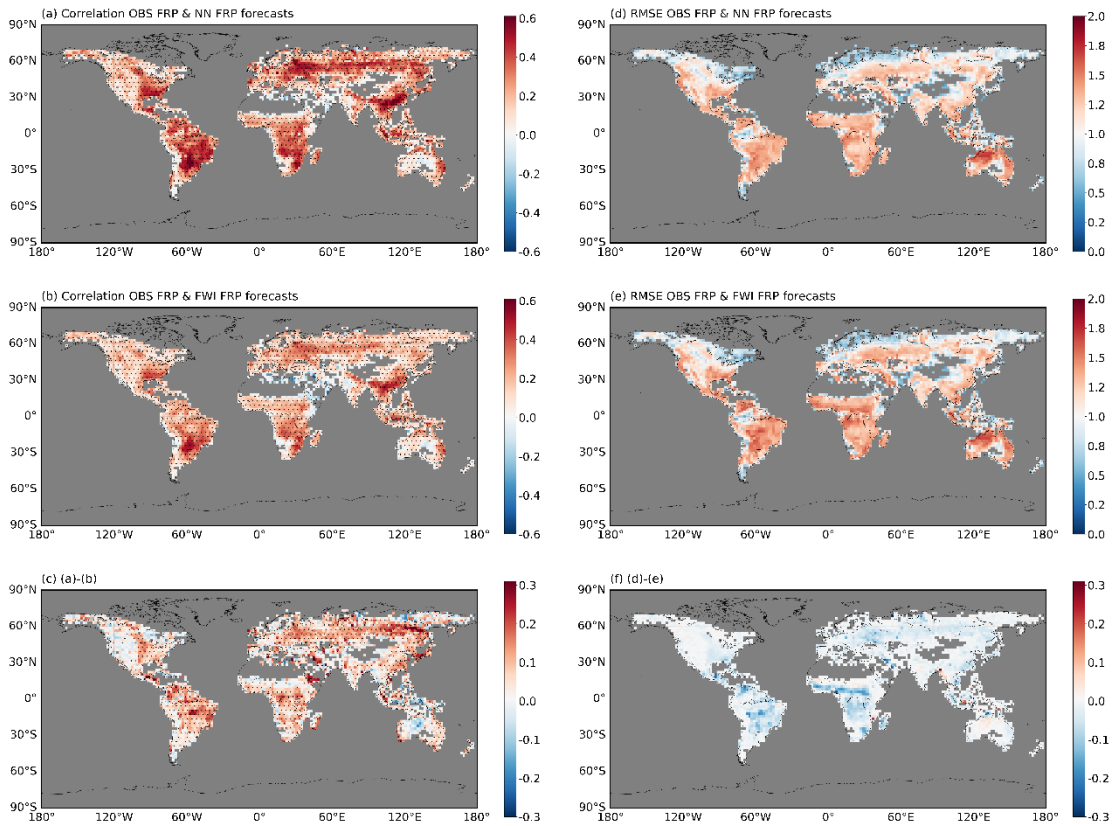

580

581

582

583

584

585

586

587

588

589

590

Figure 2. Correlation skill between the observed daily FRP and the estimated FRP values in (a) the FFNNs or (b) **FWI-based model** during 2001–2020. (c) Difference in the correlation skill in the FFNNs from that in the FWI-base model. RMSEs between the observed daily FRP and the estimated FRP values in (d) the FFNNs, or (e) **FWI-based model** during 2001–2020. (f) Difference in the RMSE in the FFNNs from that in the FWI-base model. The dots in panels (a) and (b) denote the grid points where the correlation skill exceeds a 95% confidence level based on the t-test; those in panel (c) denote the area whose correlation skill difference is above a 95% confidence level calculated as described by Zou (2007).

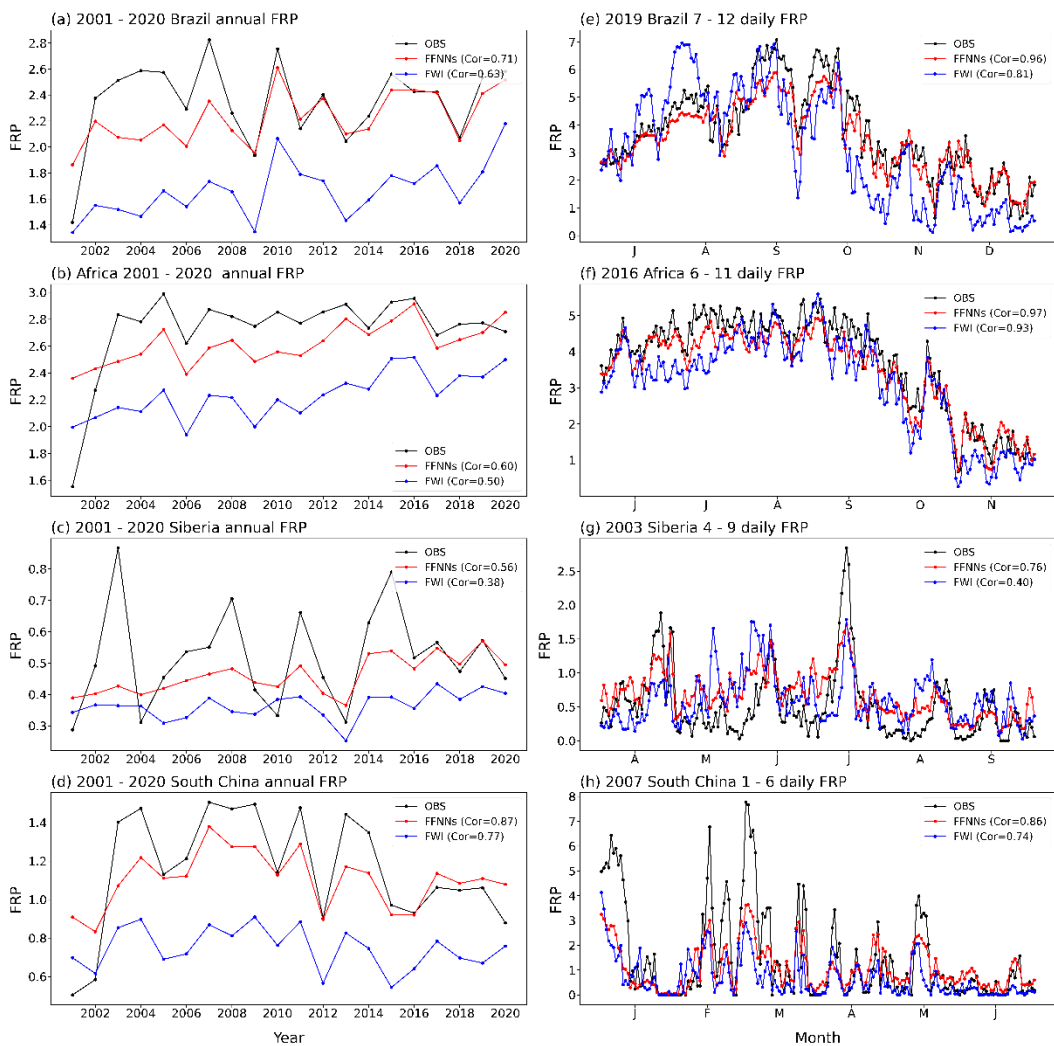

592

593

594

595

596

597

598

599

Figure 3. Time series of the annually-averaged (left) and daily (right) FRP in the observation (black), FFNNs (red), and FWI-based model (blue) over (a), (b) Brazil (64–40°W, 21–1°S), (c), (d) southern Africa (14–36°E, 18°S–6°N), (e), (f) Siberia (104–134°E, 48–60°N), and (g), (h) southern China (108–120°E, 22°N–30°N). Correlation coefficient between the observation and the FFNNs, and FWI-based model is denoted by the red, and blue in each panel, respectively.

600

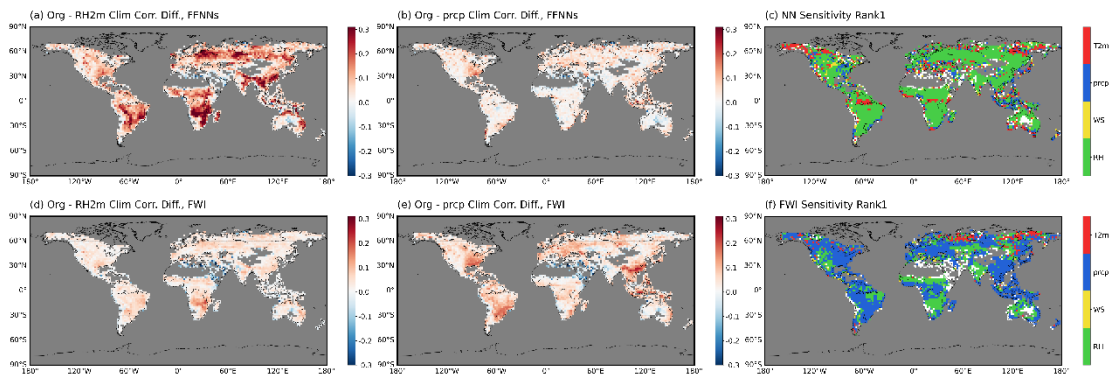

601

602

603

604

605

606

607

608

609

Figure 4. Difference in the correlation skill of the original FRP estimation in the FFNNs from that by prescribing (a) the RH2m or (b) the PRCP as the daily climatological values. (c) Spatial distribution of the meteorological variable where the decrease in correlation is largest by prescribing the climatological value. Panels (d), (e), (f) are the same as (a), (b), and (c) but for the FWI-based model. In panels (c) and (f), 2 m air temperature, PRCP, 10 m wind speed, and RH2m are indicated in red, yellow, green, and purple, respectively.

610

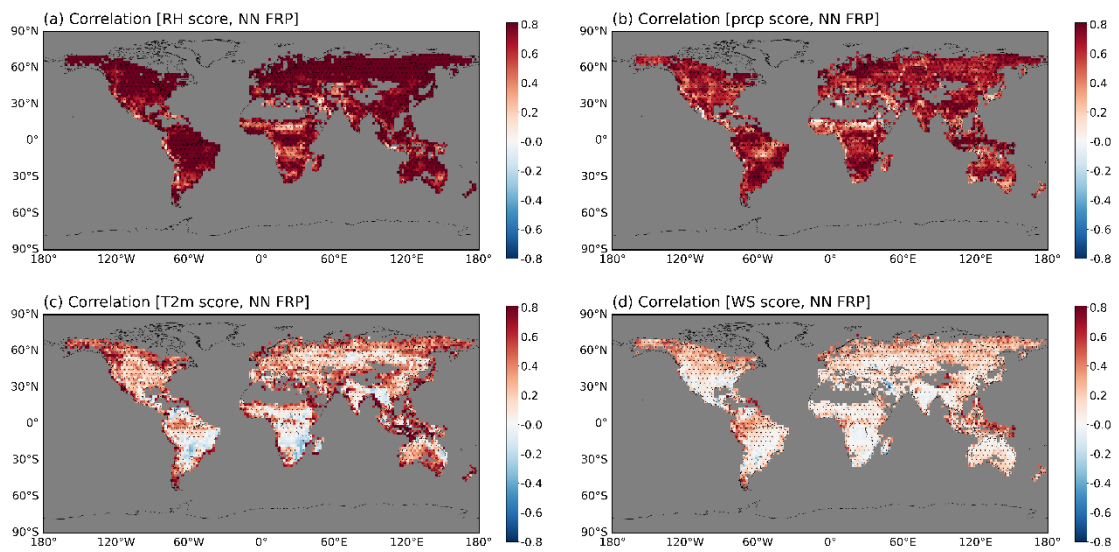

611

612

613

614

615

616

Figure 5. Correlation skill between the relevance score for each variables derived from layer-wise relevance propagation (LRP) and the estimated FRP in the FFNNs during the 2001–2020 period.

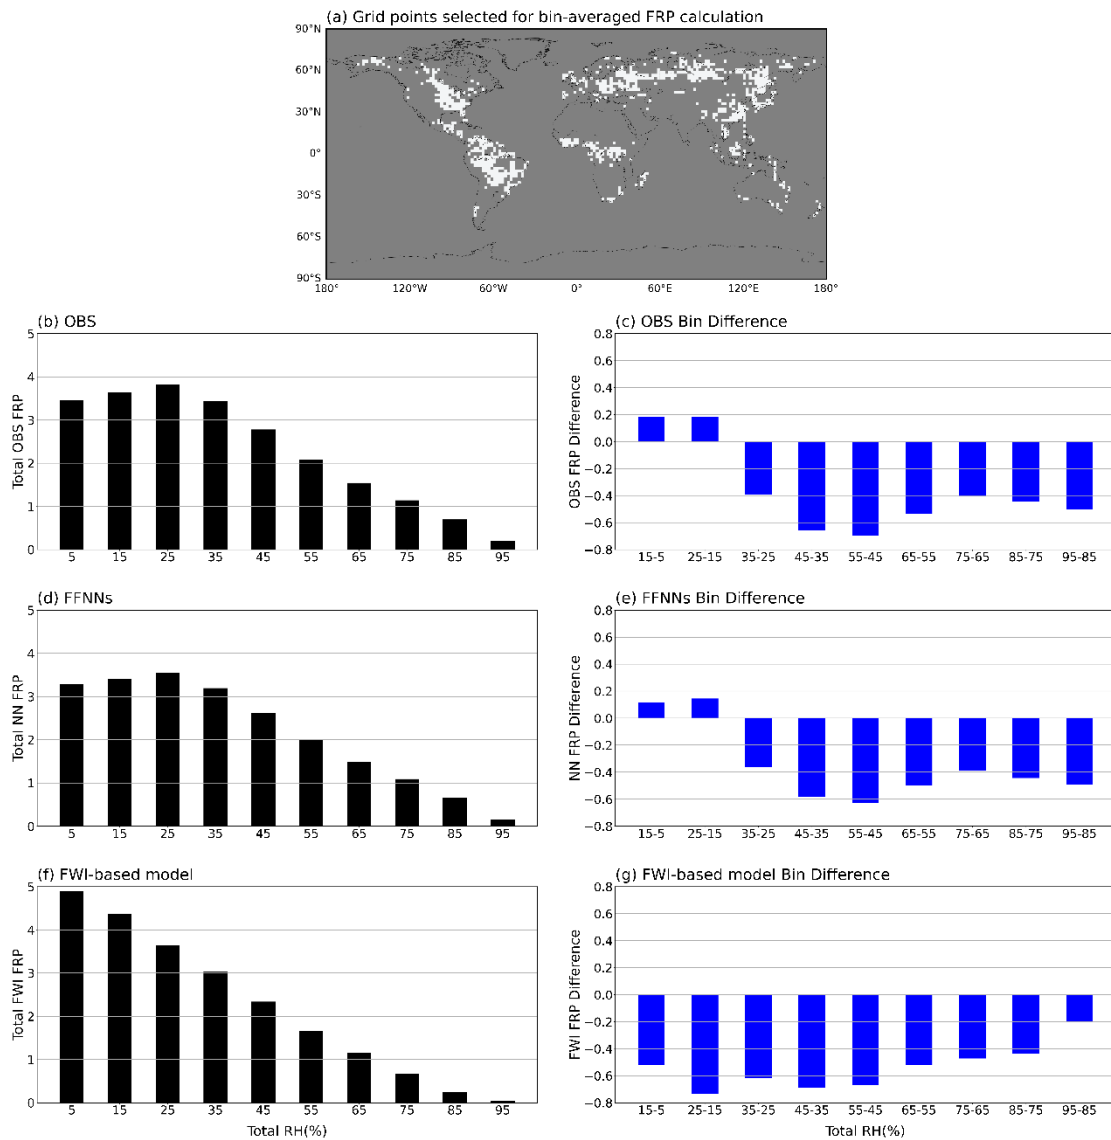

618

619

620

621

622

623

Figure 6. (a) Grid points selected for bin-averaged FRP calculation. Case-averaged FRP with respect to the RH2m with a 10% interval in (b) the observations, (d) FFNNs, and (f) FWI-based model. The figures illustrate the difference in the case-averaged FRP at the upper bin from the lower bin in (c) the observations, (e) FFNNs, and (g) FWI-based model.

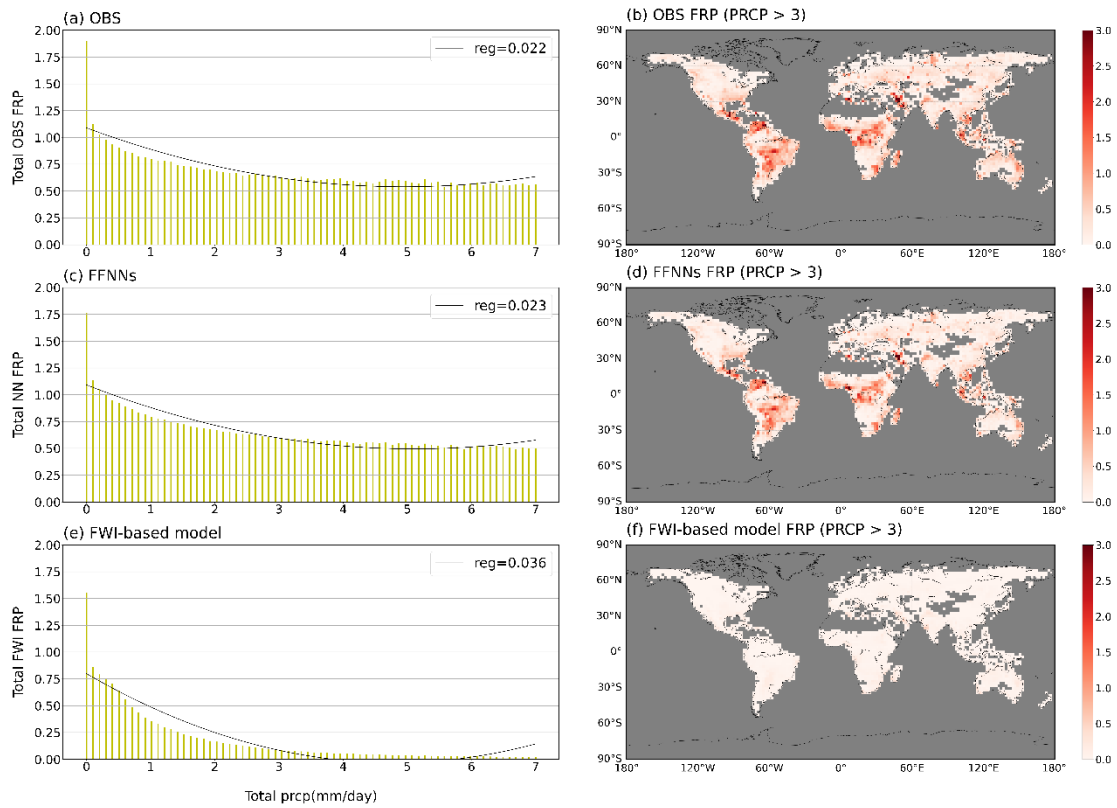

625

626

627

628

629

630

631

632

633

Figure 7. Case-averaged FRP with respect to the PRCP with 0.1 mm/day interval in (a) the observations, (c) FFNNs, and (e) FWI-based model. The black line in each panel quadratic shows the fitted line to the quadratic regression, and number in the upper right corner denotes the quadratic coefficients. The figures illustrate the spatial distribution of the case-averaged FRP when the PRCP > 3 mm/day in (b) the observations, (d) FFNNs, and (f) the FWI-based model. The selected areas for the calculation of the bin-averaged values is given in Figure 6a.
