# Supplementary material for: Regionally optimized fire parameterizations using feed-forward neural networks
Source: Copernicus journal article supplement (doi:10.5194/esd-2023-26), 2023-08-30
Supplement: Supplementary file [file esd-2023-26-AC5-supplement.pdf]

1 *Supplements of*

2 **Regionally optimized fire parameterizations**  
3 **using feed-forward neural networks**

4

5 Yoo-Geun Ham<sup>1\*</sup>, Seung-Ho Nam<sup>2</sup>, Geun-Hyeong Kang<sup>2</sup>, and Jin-Soo Kim<sup>3\*</sup>

6

7 <sup>1</sup> Department of Environmental Planning, Graduate School of Environmental Studies, Seoul National  
8 University, Seoul, South Korea

9 <sup>2</sup> Department of Oceanography, Chonnam National University, Gwangju, 61186, South Korea

10 <sup>3</sup> Low-Carbon and Climate Impact Research Centre, School of Energy and Environment, City  
11 University of Hong Kong, Tat Chee Ave, Kowloon Tong, Hong Kong, People's Republic of China

12

13 *Correspondence to:* Prof. Yoo-Geun Ham ([yoogeun@snu.ac.kr](mailto:yoogeun@snu.ac.kr)), and Prof. Jin-Soo Kim  
14 ([jinsoo.kim@cityu.edu.hk](mailto:jinsoo.kim@cityu.edu.hk))

15

|                   | EXP1      | EXP2      | EXP3                        | EXP4                        | EXP5                        |
|-------------------|-----------|-----------|-----------------------------|-----------------------------|-----------------------------|
| Training period   | 2001–2014 | 2005–2018 | 2009–2020<br>&<br>2001–2002 | 2013–2020<br>&<br>2001–2006 | 2017–2020<br>&<br>2001–2010 |
| Validation period | 2015–2016 | 2019–2020 | 2003–2004                   | 2007–2008                   | 2011–2012                   |
| Testing period    | 2017–2020 | 2001–2004 | 2005–2008                   | 2009–2012                   | 2013–2016                   |

17 Supplementary Table S1. Periods for the training, validation, and testing of the  
18 FFNNs. **Note that every period starts from Jan. 1<sup>st</sup> and end at Dec. 31<sup>st</sup>.**

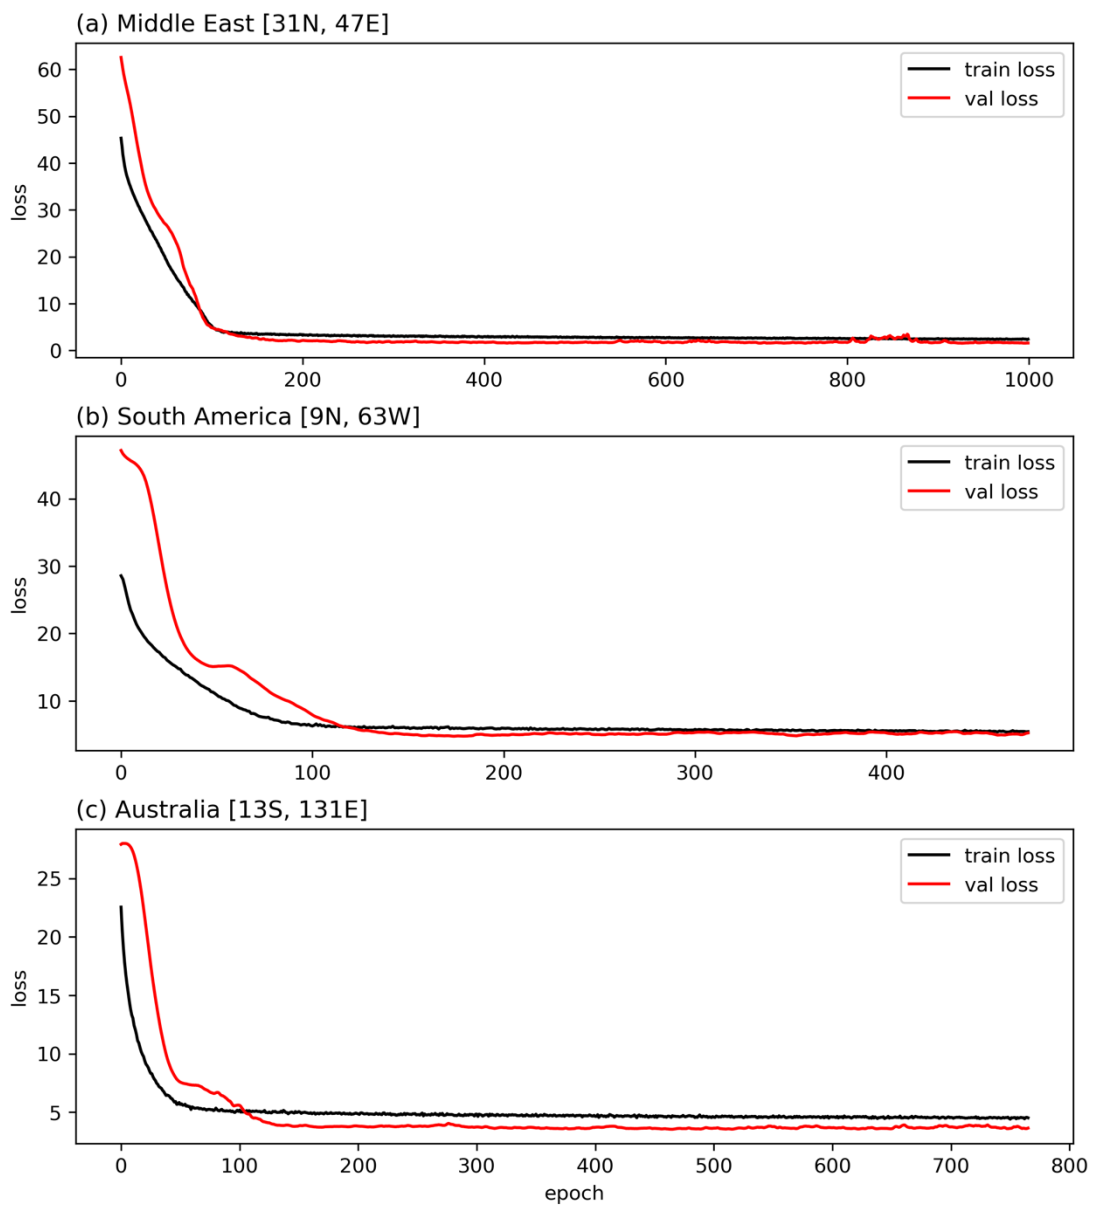

20

21 Supplementary Fig. S1. Training (black) and validation loss (red) with respect to the  
 22 epoch at the grid point in (a) the middle East (centered at 31°N, 47°E), (b) South  
 23 America (centered at 9°N, 63°W), and (c) Australia (centered at 13°S, 131°E).

24

25

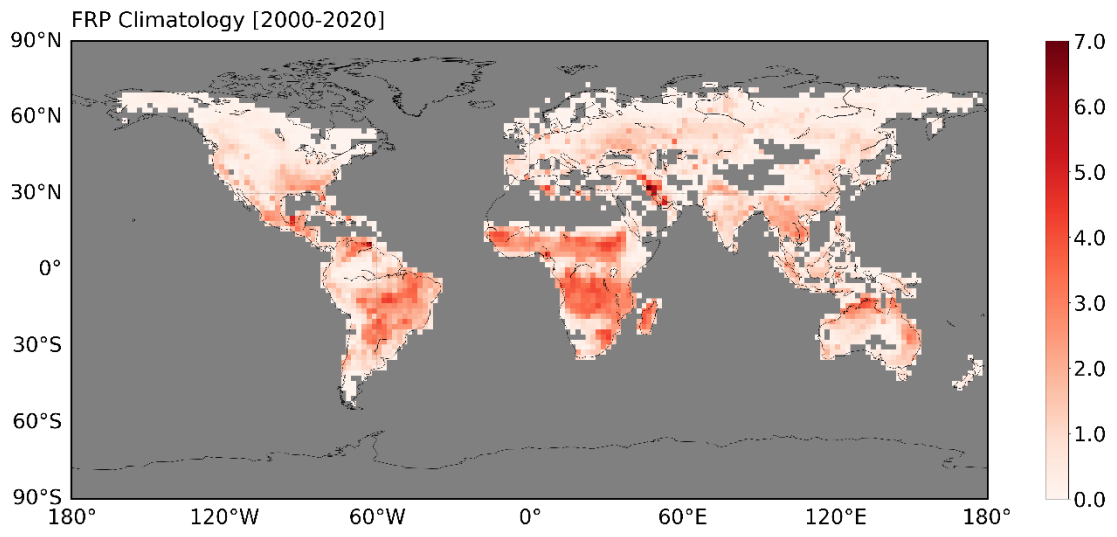

26

27 **Supplementary Fig. S2. The spatial distribution of the FRP climatology during 2001-**  
28 **2020 period.**

29

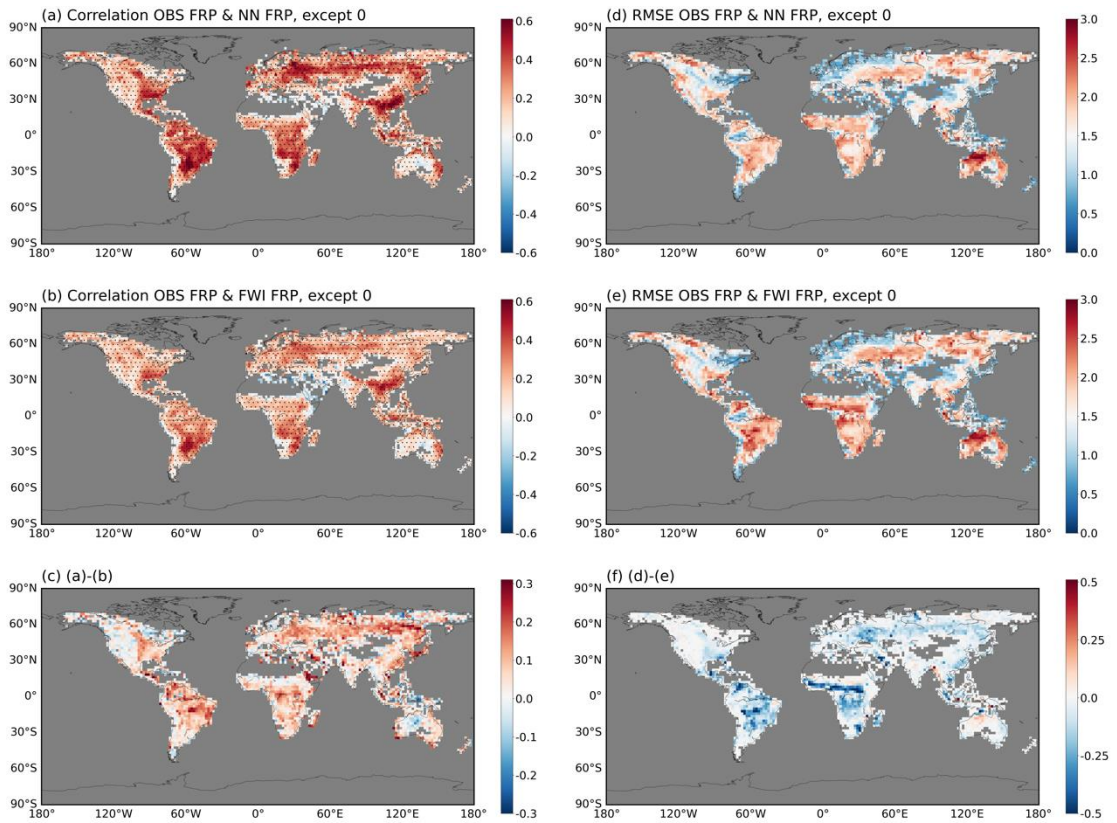

31

32 Supplementary Fig. S3. Same as main Fig. 2, but for cases where the observed FRP >  
33 0.

34

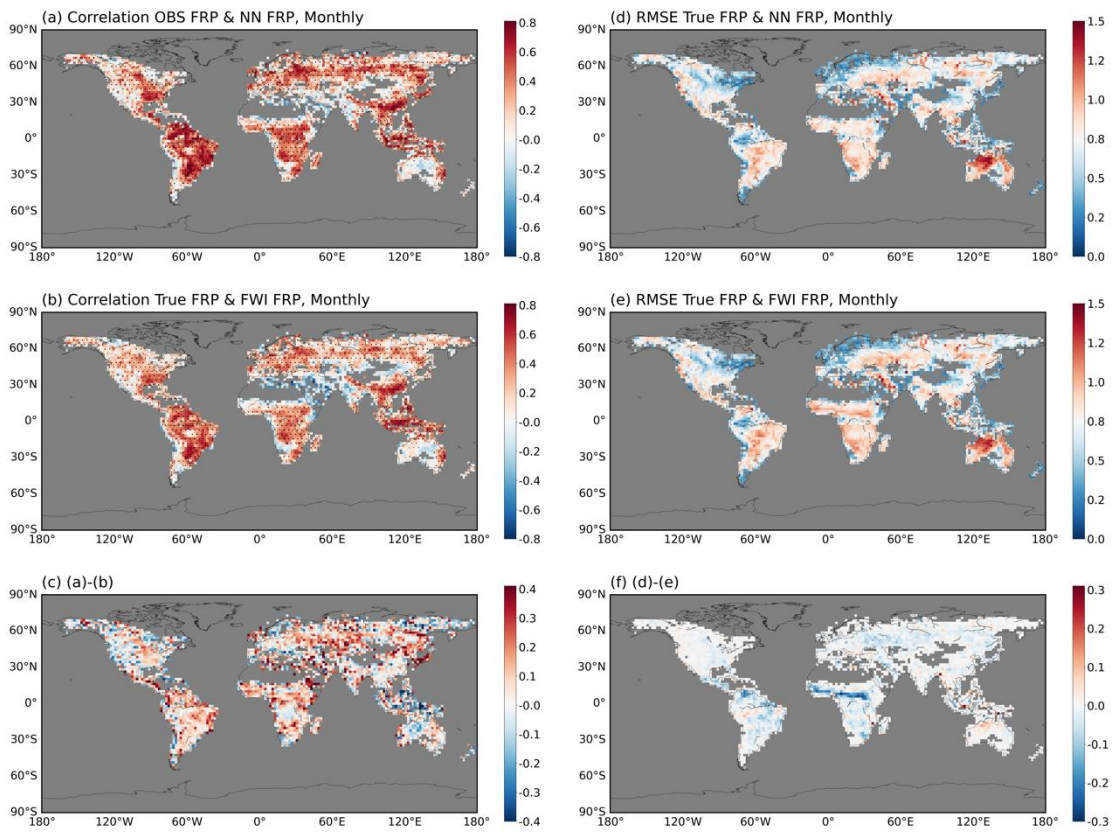

35

36 Supplementary Fig. S4. Same as main Fig. 2, but using monthly-averaged FRP.

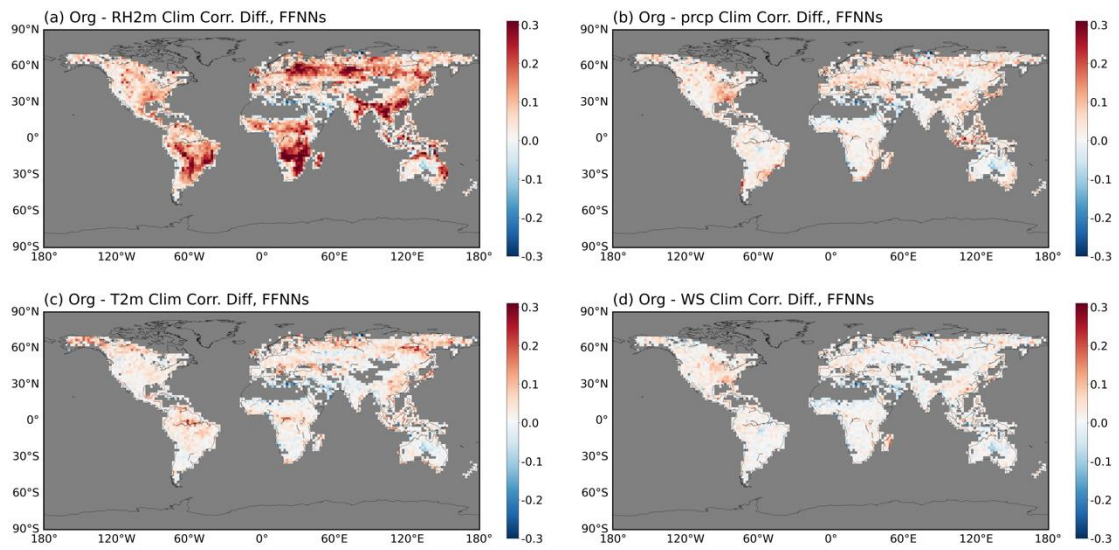

38

39 Supplementary Fig. S5. Difference in the correlation skill of the original FRP  
40 estimation in the FFNNs from that by using (a) the RH2m, (b) PRCP, (c) T2m, and (d)  
41 WS10m as the daily climatological values.

42

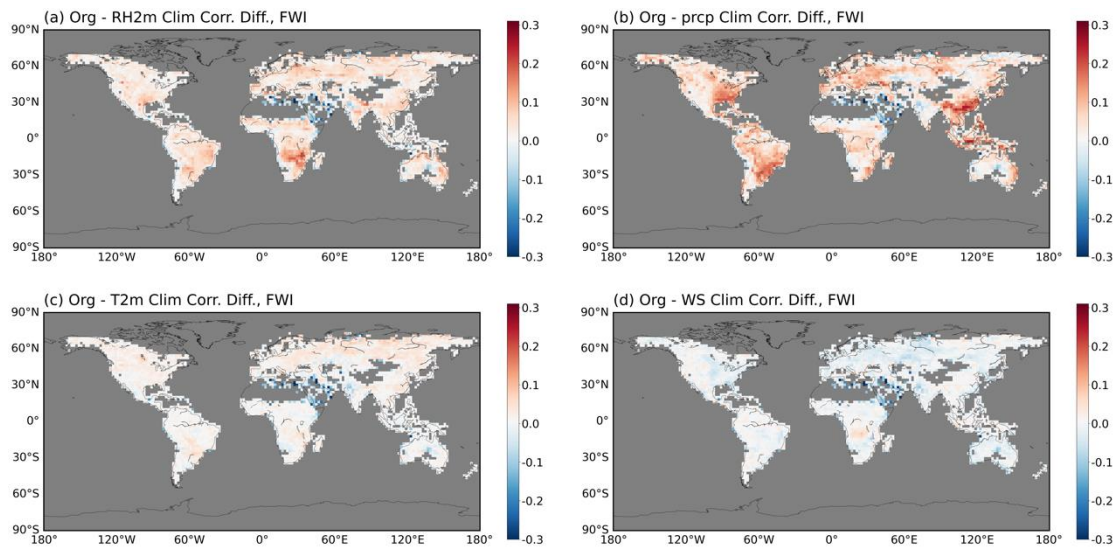

44

45 Supplementary Fig. S6. Difference in the correlation skill of the original FRP  
46 estimation in the FWI-based model from that by using (a) the RH2m, (b) PRCP, (c)  
47 T2m, and (d) WS10m as the daily climatological values.

48
